# Supplementary material for: Comprehensive analysis of coding and non-coding RNA transcriptomes related to hypoxic adaptation in Tibetan chickens
Source: J Anim Sci Biotechnol. 2021 May 3;12:60. doi: 10.1186/s40104-021-00582-2 (PMC8091548; doi:10.1186/s40104-021-00582-2)
Supplement: Supplementary file 6 — Additional file 6: Table S5. The 389 differentially expressed lncRNAs (DE lncRNAs), 73 DE miRNAs, and 354 DE genes. [file 40104_2021_582_MOESM6_ESM.xlsx]

## Sheet: DELs
Table S5a. 389 differentially expressed lncRNAs (DE lncRNAs).
LncRNA ID	TC1_Count	TC2_Count	TC3_Count	CH1_Count	CH2_Count	CH3_Count	TC1_FPKM	TC2_FPKM	TC3_FPKM	CH1_FPKM	CH2_FPKM	CH3_FPKM	log2FC	P value	FDR	Regulated
MSTRG.100058.2	9	75	43	0	0	0	0.035441	0.329369	0.186344	0	0	0	7.88574	1.04e-06	0.0107645	up
MSTRG.1034.3	30	74	44	0	1	0	0.176212	0.446133	0.260818	0	0.001061	0	6.60119	1.91e-09	0.000227614	up
MSTRG.104098.2	870	456	0	0	0	0	0.524659	0.276566	0	0	0	0	8.18437	0.000234	0.0279925	up
MSTRG.104163.1	45	143	75	12	13	14	0.059715	0.193375	0.100098	0.016062	0.016363	0.01807	2.64153	2.44e-05	0.00653546	up
MSTRG.104163.23	36	17	64	0	0	0	0.171481	0.08074	0.307233	0	0	0	7.92045	4.98e-08	0.00814407	up
MSTRG.104734.1	144	157	192	52	64	41	0.455315	0.501778	0.607546	0.165675	0.203125	0.131626	1.57992	5.82e-07	0.00106283	up
MSTRG.104767.2	276	213	403	37	60	90	0.631095	0.489521	0.918988	0.085836	0.13656	0.209945	2.14912	7.04e-05	0.0156851	up
MSTRG.105822.1	162	151	118	60	26	41	0.282869	0.264553	0.205637	0.10565	0.045659	0.072578	1.68632	0.000464127	0.0431159	up
MSTRG.112595.10	327	420	0	0	0	0	0.309781	0.400709	0	0	0	0	8.00161	0.000327	0.0322185	up
MSTRG.114886.1	10	23	15	0	0	0	0.347676	0.833312	0.525044	0	0	0	6.91716	3.57e-06	0.0430108	up
MSTRG.115756.32	468	922	0	0	0	0	0.381054	0.756219	0	0	0	0	8.19844	0.0002113	0.0277919	up
MSTRG.115756.42	767	1377	60	0	0	0	0.460071	0.832047	0.035347	0	0	0	11.069	1.43e-09	2.82e-06	up
MSTRG.115756.46	165	0	1278	0	0	0	0.106608	0	0.827091	0	0	0	7.90181	0.0003786	0.0398467	up
MSTRG.116165.31	1	333	27	1	3	2	0.001	0.466655	0.036447	0.001295	0.003833	0.002176	5.2519	0.00178443	0.0488028	up
MSTRG.116469.20	0	381	452	0	0	0	0	0.23188	0.27282	0	0	0	8.06158	0.0003987	0.0304166	up
MSTRG.116469.22	0	171	271	0	0	0	0	0.14127	0.221616	0	0	0	7.71075	0.00041765	0.0413496	up
MSTRG.116735.7	81	32	43	0	0	0	0.446905	0.175167	0.232248	0	0	0	8.32704	1.02e-09	0.00301002	up
MSTRG.118362.24	495	0	1813	0	0	0	0.195276	0	0.712612	0	0	0	8.17523	0.00037453	0.0306176	up
MSTRG.11906.6	9	5	76	1	0	0	0.0555	0.031764	0.502579	0.003472	0	0	5.60538	0.000558582	0.0467746	up
MSTRG.120720.1	301	319	584	99	119	76	0.228236	0.243162	0.441568	0.075863	0.089923	0.05837	1.9498	8.01e-06	0.00379731	up
MSTRG.120755.1	35	50	70	12	19	12	0.136949	0.194255	0.272115	0.046027	0.071186	0.045272	1.76194	0.00042343	0.0469813	up
MSTRG.12318.1	386	1	4399	1	3	7	0.091158	0.000135	1.03588	1.8e-05	0.000492	0.001623	7.53267	0.00142919	0.00285263	up
MSTRG.123470.6	112	120	147	1	0	4	0.575167	0.623611	0.756404	0.001093	0	0.019994	5.97495	3.26e-15	5.02e-08	up
MSTRG.123533.3	19	9	20	0	0	0	0.771241	0.34798	0.80495	0	0	0	6.91637	3.82e-06	0.0431159	up
MSTRG.123539.2	31	30	15	0	0	0	0.396981	0.386443	0.191976	0	0	0	7.48043	1.37e-07	0.018605	up
MSTRG.125293.1	1	86	155	1	1	1	3.9e-05	0.09762	0.174941	0.000124	9.9e-05	0.000134	5.6709	0.00016387	0.0171666	up
MSTRG.125685.12	15	16	14	0	0	0	0.238064	0.259856	0.227462	0	0	0	6.88994	1.67e-06	0.0429679	up
MSTRG.125685.4	11	46	29	0	0	0	0.179886	0.787678	0.487758	0	0	0	7.53641	6.1e-07	0.018605	up
MSTRG.126053.2	529	599	0	0	0	1	0.480147	0.547479	0	0	0	7.8e-05	7.54938	0.0003222	0.0310495	up
MSTRG.12853.9	206	782	0	0	0	0	0.238314	0.91072	0	0	0	0	7.97638	0.00027863	0.035183	up
MSTRG.128588.13	399	215	164	0	0	0	0.253423	0.137363	0.103478	0	0	0	10.3107	1.67e-17	7.35e-06	up
MSTRG.128839.3	0	189	368	0	0	0	0	0.249382	0.481083	0	0	0	7.8261	0.00032255	0.0377131	up
MSTRG.131004.1	2020	1874	1544	0	0	0	0.623663	0.582489	0.474907	0	0	0	12.8954	1.63e-41	1.97e-11	up
MSTRG.133198.5	533	0	87	0	0	0	0.439536	0	0.071071	0	0	0	7.67516	0.00047784	0.0469813	up
MSTRG.133793.4	249	0	163	0	0	0	0.291087	0	0.188837	0	0	0	7.67108	0.00043365	0.0429679	up
MSTRG.133847.1	62	79	48	10	13	21	0.172407	0.220425	0.131702	0.027767	0.035854	0.058114	2.01122	0.000110799	0.0248012	up
MSTRG.134137.22	955	5381	4242	0	0	0	0.249505	1.4166	1.1053	0	0	0	13.3678	5.2e-26	1.97e-11	up
MSTRG.135623.27	223	0	176	0	0	0	0.436296	0	0.341816	0	0	0	7.66046	0.00039879	0.0430108	up
MSTRG.135623.48	179	322	259	0	0	0	0.119005	0.215725	0.171617	0	0	0	10.3488	3.16e-20	4.48e-06	up
MSTRG.135623.49	0	107	241	0	0	0	0	0.141405	0.316815	0	0	0	7.53228	0.000392343	0.0489645	up
MSTRG.136186.4	67	206	166	0	0	0	0.160297	0.495268	0.395186	0	0	0	9.5631	8e-14	9.81e-05	up
MSTRG.136616.2	1	200	40	0	0	0	0.000122	0.470332	0.091467	0	0	0	8.02343	9.8261e-05	0.0171666	up
MSTRG.137630.2	58	508	89	19	16	10	0.105849	0.932995	0.16167	0.033482	0.028119	0.017813	3.66384	0.000192155	0.0232542	up
MSTRG.140060.2	57	161	273	0	0	0	0.291621	0.826942	1.39281	0	0	0	9.6141	1.72e-12	0.000103907	up
MSTRG.140896.7	164	115	78	0	0	0	0.638243	0.449715	0.301643	0	0	0	9.37908	2.92e-14	0.000141842	up
MSTRG.142167.1	74	126	81	17	15	19	0.359716	0.614756	0.391026	0.083215	0.07242	0.092763	2.3749	9.81e-08	0.000168632	up
MSTRG.143255.3	986	630	526	0	0	0	0.535566	0.344276	0.284577	0	0	0	11.6362	5.65e-27	2.07e-08	up
MSTRG.143280.7	560	102	3	0	0	0	1.80092	0.327654	0.007505	0	0	0	9.16731	0.000774903	0.00188471	up
MSTRG.143717.10	13	22	18	0	1	2	0.100861	0.179302	0.14613	0	0.003539	0.015767	3.913	1.51e-05	0.0122559	up
MSTRG.143772.8	44	8	9	0	0	0	1.10834	0.198273	0.223786	0	0	0	7.03065	4.63e-05	0.0431159	up
MSTRG.143807.1	222	181	93	56	30	32	4.86099	3.99947	2.03257	1.24226	0.642478	0.717227	1.99488	0.000472368	0.044341	up
MSTRG.144008.8	15	81	16	0	0	0	0.108759	0.613268	0.119254	0	0	0	7.73364	2.58e-06	0.0151806	up
MSTRG.144288.6	15	10	20	0	0	0	0.207538	0.1366	0.280839	0	0	0	6.85481	3.74e-06	0.0464857	up
MSTRG.144613.1	16	15	21	2	5	2	0.182346	0.177873	0.250824	0.016623	0.055226	0.014479	2.41888	0.000378794	0.04921	up
MSTRG.144728.1	28	38	53	9	10	8	0.168568	0.2249	0.313339	0.049568	0.054636	0.044161	2.04808	4.81e-05	0.0140608	up
MSTRG.146488.2	40	16	18	0	0	0	0.226198	0.09084	0.101425	0	0	0	7.41525	4.85e-07	0.0227335	up
MSTRG.146883.3	334	456	237	36	75	74	0.45161	0.621866	0.319225	0.04946	0.101029	0.102271	2.38217	6.05e-06	0.00282684	up
MSTRG.147643.109	30	25	69	0	0	0	0.809642	0.657467	1.86191	0	0	0	8.01961	1.15e-08	0.00611411	up
MSTRG.147643.113	59	41	55	0	0	0	2.00796	1.40579	1.86557	0	0	0	8.39576	2.35e-11	0.00219991	up
MSTRG.147643.134	27	312	30	0	0	0	0.050778	0.602372	0.05585	0	0	0	8.92139	1.63e-06	0.00163367	up
MSTRG.147643.140	770	18	49	0	0	0	1.48329	0.033824	0.092924	0	0	0	9.56878	0.000120228	0.000584133	up
MSTRG.147643.165	78	67	63	3	4	3	1.51741	1.32346	1.23233	0.048666	0.074663	0.055822	4.26064	3.53e-14	5.1e-09	up
MSTRG.147643.182	40	9	93	0	0	0	0.485944	0.104967	1.12241	0	0	0	7.97442	1.51e-06	0.00934729	up
MSTRG.147643.187	42	20	23	0	0	0	0.732999	0.342208	0.398877	0	0	0	7.61207	6.75e-08	0.014452	up
MSTRG.147643.189	304	147	90	6	15	9	4.30414	2.08786	1.26543	0.080389	0.210897	0.12346	4.04031	4.77e-08	6.13e-05	up
MSTRG.147643.27	150	182	153	25	32	38	1.82114	2.22426	1.84908	0.301925	0.380182	0.469574	2.2725	2.36e-11	8.6e-07	up
MSTRG.147643.37	236	263	0	0	0	0	2.1738	2.436	0	0	0	0	7.79571	0.00035656	0.0383739	up
MSTRG.147643.5	60	39	139	0	0	0	0.467927	0.30724	1.08523	0	0	0	8.77381	2.04e-10	0.00106283	up
MSTRG.147662.1	99	65	73	15	29	13	2.5243	1.65068	1.84325	0.369518	0.741177	0.317173	1.98158	0.00010384	0.024074	up
MSTRG.147717.7	213	56	258	0	0	0	0.314329	0.082081	0.379045	0	0	0	9.70131	1.46e-12	8.61e-05	up
MSTRG.148856.13	0	216	1128	0	0	0	0	0.136747	0.707967	0	0	0	8.00463	0.000386576	0.035183	up
MSTRG.1495.1	19	26	16	0	0	2	0.221159	0.304823	0.185121	0	0	0.013867	4.59885	4.5e-06	0.00954454	up
MSTRG.149881.3	84	165	117	3	15	0	0.3056	0.607106	0.424087	0.007495	0.054875	0	4.05873	0.000618789	0.0485515	up
MSTRG.152671.28	5685	50	66	3	0	0	1.05943	0.009246	0.012165	0.000422	0	0	8.86203	0.0121542	0.00138407	up
MSTRG.16057.23	594	383	583	0	0	0	0.718588	0.465618	0.702833	0	0	0	11.2705	1.8e-26	7.74e-08	up
MSTRG.16380.1	49	8	12	0	0	0	0.4433	0.068749	0.105404	0	0	0	7.17975	2.47e-05	0.036059	up
MSTRG.17020.2	25	23	13	0	0	0	0.432644	0.399736	0.21595	0	0	0	7.22504	5.06e-07	0.0279925	up
MSTRG.17610.24	171	10	133	0	0	0	0.243719	0.013726	0.189265	0	0	0	8.81697	4.61e-07	0.00184521	up
MSTRG.17610.26	0	216	279	0	0	0	0	0.331438	0.423296	0	0	0	7.78828	0.0003123	0.0383739	up
MSTRG.17610.51	28	83	27	2	0	0	0.178107	0.53474	0.168072	0.012548	0	0	5.64395	1.26e-06	0.00259607	up
MSTRG.18801.3	616	2419	1397	0	0	0	0.180561	0.714901	0.408427	0	0	0	12.3902	2.11e-25	1.36e-09	up
MSTRG.19136.1	82	274	60	0	0	0	0.350661	1.18402	0.254821	0	0	0	9.37888	6.18e-11	0.000226377	up
MSTRG.19228.2	85	96	32	4	6	1	0.324354	0.367747	0.121304	0.011936	0.019528	0.000316	4.11258	9e-07	0.000763434	up
MSTRG.19617.1	16	58	39	0	0	0	0.123519	0.471135	0.311969	0	0	0	7.88623	5.11e-08	0.00870598	up
MSTRG.19806.4	20	53	14	0	0	0	0.215578	0.589785	0.156222	0	0	0	7.54612	7.79e-07	0.018605	up
MSTRG.20151.18	281	14	119	0	0	0	0.282546	0.013399	0.119001	0	0	0	9.12149	2.96e-07	0.000897459	up
MSTRG.20728.7	373	1594	2091	0	0	0	0.163439	0.703951	0.913757	0	0	0	12.1741	4.61e-21	6.06e-09	up
MSTRG.21389.12	738	1615	426	0	0	0	0.524897	1.15715	0.301514	0	0	0	11.7997	7.33e-22	2.26e-08	up
MSTRG.21698.5	230	1	18	0	0	1	0.130927	0.000345	0.010074	0	0	0.000376	6.53019	0.000400234	0.0394693	up
MSTRG.2189.40	0	1698	1567	0	0	0	0	0.27834	0.254137	0	0	0	8.36737	0.000213565	0.0249006	up
MSTRG.22120.1	30	3	41	0	0	0	0.287531	0.019609	0.394512	0	0	0	7.16966	6.1e-05	0.0384034	up
MSTRG.22471.2	37	17	42	1	1	5	0.406427	0.188791	0.46202	0.010195	0.010306	0.054817	3.57485	5.19e-05	0.0162094	up
MSTRG.22506.14	97	96	240	0	0	0	0.654372	0.655261	1.62128	0	0	0	9.55169	5.77e-14	9.81e-05	up
MSTRG.22539.11	9	45	10	0	0	0	0.148486	0.751444	0.157229	0	0	0	7.09685	2.4e-05	0.0390573	up
MSTRG.23762.41	411	0	710	0	0	0	0.481296	0	0.828864	0	0	0	8.15463	0.000309813	0.0279925	up
MSTRG.25780.10	133	225	155	0	0	0	0.113611	0.194447	0.132204	0	0	0	9.86163	1.18e-17	2.7e-05	up
MSTRG.25780.18	317	182	0	0	0	0	0.326296	0.188989	0	0	0	0	7.7729	0.000409812	0.0393465	up
MSTRG.25780.4	95	2	309	0	0	0	0.099469	0.001371	0.323799	0	0	0	8.67712	1.3728e-05	0.00451618	up
MSTRG.26.40	93	162	160	0	0	0	0.701536	1.23817	1.20932	0	0	0	9.58879	3.75e-16	6.94e-05	up
MSTRG.27760.7	188	1	26	0	0	0	0.269232	0.000105	0.036638	0	0	0	7.89004	0.00021935	0.0227335	up
MSTRG.29252.7	199	356	320	95	77	81	0.202133	0.364126	0.324014	0.097262	0.078176	0.083558	1.71053	2.95e-06	0.00226104	up
MSTRG.29317.2	61	68	20	0	0	0	0.222256	0.248289	0.071523	0	0	0	8.22427	8.78e-09	0.00423382	up
MSTRG.29398.22	199	454	476	0	0	0	0.237927	0.548152	0.567972	0	0	0	10.7778	1.66e-20	9.77e-07	up
MSTRG.29869.9	59	1	127	0	0	0	0.234837	0.001746	0.505102	0	0	0	7.86049	0.000213768	0.0203665	up
MSTRG.30114.20	4	167	98	0	0	0	0.009973	0.528611	0.304185	0	0	0	8.47088	1.83e-05	0.00485451	up
MSTRG.31242.2	34	98	41	3	0	0	0.205903	0.610086	0.250539	0.015259	0	0	5.42642	2.32e-06	0.00336295	up
MSTRG.33431.23	23	29	66	0	0	0	0.115403	0.147912	0.335451	0	0	0	7.95528	1.87e-08	0.00709224	up
MSTRG.33716.5	637	427	1015	0	0	0	0.275737	0.185915	0.437563	0	0	0	11.5589	2.13e-25	2.95e-08	up
MSTRG.34606.1	68	45	48	0	0	4	0.604827	0.405201	0.424903	0	0	0.030832	4.93271	5.27e-06	0.00888242	up
MSTRG.35622.2	7	2	153	0	0	0	0.008814	0.002577	0.208543	0	0	0	7.56334	0	0.033284	up
MSTRG.35622.5	0	318	515	0	0	0	0	0.321589	0.515035	0	0	0	8.04454	0.0003876	0.0308761	up
MSTRG.36455.3	0	1124	249	0	0	0	0	0.703751	0.15433	0	0	0	8.0377	0.0003981	0.0343818	up
MSTRG.38220.3	119	122	97	0	0	0	0.324324	0.333206	0.262763	0	0	0	9.37467	4.97e-16	0.000119901	up
MSTRG.38665.1	30	20	19	6	5	3	0.392198	0.260803	0.234724	0.067287	0.052805	0.032973	2.2118	0.000313636	0.0414573	up
MSTRG.3903.22	915	289	607	0	0	0	0.883399	0.280427	0.583661	0	0	0	11.3212	2.89e-21	1.29e-07	up
MSTRG.39105.8	219	113	572	42	28	10	0.431888	0.224981	1.12891	0.082565	0.054372	0.018525	3.33391	0.000106499	0.0162094	up
MSTRG.39307.5	992	0	379	0	0	0	2.64768	0	1.00841	0	0	0	8.14744	0.0002176	0.0298739	up
MSTRG.39307.6	253	384	331	1	1	1	0.65486	1.00357	0.855035	0.000895	0.000482	0.001523	8.02378	2.94e-27	1e-15	up
MSTRG.40079.2	12	18	234	0	0	0	0.02651	0.042029	0.545545	0	0	0	8.4025	3.48e-05	0.00586764	up
MSTRG.41645.1	675	179	372	5	0	0	15.4126	4.11085	8.44712	0.11442	0	0	7.27741	1.22e-07	9.78e-05	up
MSTRG.41646.22	2	15	754	0	0	0	0.008005	0.08011	4.10543	0	0	0	8.80994	1.098e-05	0.00598478	up
MSTRG.41646.23	0	112	968	0	0	0	0	0.658429	5.67517	0	0	0	7.8038	0.00043768	0.0431159	up
MSTRG.41715.54	62	190	359	1	8	1	0.954917	2.9731	5.56055	0.004289	0.121024	0.005209	5.58807	2.76e-07	0.000189794	up
MSTRG.43305.3	53	65	60	11	18	21	0.251394	0.310131	0.284925	0.051507	0.081814	0.099612	1.74856	3.79e-05	0.0158587	up
MSTRG.44286.2	77	24	232	0	0	0	0.171791	0.052117	0.515624	0	0	0	8.98062	1.7e-08	0.000956205	up
MSTRG.44319.1	7	20	37	0	1	0	0.103302	0.296267	0.553577	0	0.011994	0	5.37643	3.39e-05	0.0243814	up
MSTRG.44348.11	2	130	424	0	0	0	0.001042	0.096349	0.311496	0	0	0	8.96131	5.72e-06	0.00275803	up
MSTRG.44348.15	0	104	449	0	0	0	0	0.082265	0.351667	0	0	0	7.70236	0.00049173	0.0434396	up
MSTRG.45443.5	1371	0	1818	0	0	0	0.524853	0	0.693354	0	0	0	8.34722	0.00029187	0.0254629	up
MSTRG.48039.27	404	130	0	0	0	0	0.309045	0.10005	0	0	0	0	7.73797	0.00043217	0.0417966	up
MSTRG.48665.1	25	84	23	0	0	0	0.308103	1.04715	0.275406	0	0	0	8.02624	8.77e-08	0.0068891	up
MSTRG.49101.2	524	0	258	0	0	1	0.515301	0	0.252675	0	0	9.4e-05	7.22071	0.00049134	0.0414573	up
MSTRG.49734.4	148	105	136	0	0	0	0.300662	0.213571	0.274364	0	0	0	9.54083	1.2e-16	7.46e-05	up
MSTRG.49958.21	0	5678	2445	0	0	1	0	1.72697	0.735944	0	0	0.000149	8.69506	0.00010988	0.0109294	up
MSTRG.5112.1	26	25	18	0	2	0	0.736897	0.721182	0.497243	0	0.028988	0	4.79882	9.12e-07	0.00423382	up
MSTRG.5112.2	29	10	13	0	0	0	0.833244	0.271273	0.369017	0	0	0	6.97712	6.6e-06	0.0414573	up
MSTRG.51748.22	270	118	0	0	0	0	0.887085	0.391081	0	0	0	0	7.59942	0.00048729	0.0468289	up
MSTRG.56995.2	50	93	46	2	0	0	0.171629	0.323871	0.156648	0.003914	0	0	6.15501	7e-10	5.78e-05	up
MSTRG.58849.1	127	113	80	0	0	0	0.437678	0.393523	0.275206	0	0	0	9.28215	7.7e-15	0.000170237	up
MSTRG.59013.2	0	523	563	0	0	0	0	0.462292	0.492191	0	0	0	8.17442	0.00021372	0.0274322	up
MSTRG.60439.2	641	692	540	218	188	232	0.670642	0.729201	0.56291	0.23112	0.196544	0.246878	1.48419	2.85e-08	0.000141842	up
MSTRG.60746.12	1	699	137	0	0	0	7.1e-05	0.375553	0.07265	0	0	0	9.12509	1.287e-05	0.00276075	up
MSTRG.61946.1	20	23	19	0	1	0	0.260262	0.308119	0.249022	0	0.012891	0	5.47398	2.9e-07	0.00431245	up
MSTRG.61993.20	205	58	656	0	0	0	0.324721	0.091433	1.03802	0	0	0	10.1577	1.56e-10	3.72e-05	up
MSTRG.62069.26	135	135	95	0	0	0	0.335763	0.338105	0.234351	0	0	0	9.45511	5.9e-16	9.81e-05	up
MSTRG.63187.28	473	480	0	0	0	0	0.226509	0.231347	0	0	0	0	8.1132	0.00021372	0.0291336	up
MSTRG.63187.29	773	706	0	0	0	0	0.372443	0.342272	0	0	0	0	8.25722	0.00021987	0.025802	up
MSTRG.63187.30	1356	1088	0	0	0	0	0.648514	0.524023	0	0	0	0	8.33082	0.00023267	0.0254629	up
MSTRG.64166.1	226	308	205	0	5	14	0.648326	0.888594	0.58501	0	0.011589	0.040714	4.93403	9.05e-06	0.00336295	up
MSTRG.64717.21	293	1049	185	7	0	0	0.345548	1.24522	0.217279	0.007373	0	0	6.94002	4.94e-05	0.00224188	up
MSTRG.64978.9	59	4	32	0	0	0	1.02424	0.063232	0.546544	0	0	0	7.46019	2.86e-05	0.0266962	up
MSTRG.65020.1	3	36	41	0	0	0	0.024229	0.433572	0.49095	0	0	0	7.24503	4.98e-05	0.035183	up
MSTRG.66977.1	151	227	138	0	0	0	0.868679	1.31691	0.790859	0	0	0	9.86917	1.26e-17	2.69e-05	up
MSTRG.67103.3	36	47	35	0	0	0	0.392661	0.507888	0.376296	0	0	0	8.06375	3.65e-10	0.00475628	up
MSTRG.7047.1	62	99	50	2	0	6	2.10795	3.39018	1.66494	0.064431	0	0.19549	4.45334	2.95e-06	0.00294965	up
MSTRG.71668.4	135	154	229	15	53	18	1.6906	1.94895	2.86454	0.184026	0.664869	0.22384	2.48562	0.000166607	0.0254629	up
MSTRG.71841.1	371	45	221	2	18	1	4.50528	0.544559	2.67775	0.021746	0.215147	0.003928	4.59735	0.000258058	0.0244102	up
MSTRG.74434.13	11	24	32	0	0	2	0.072021	0.165388	0.217451	0	0	0.010198	4.66396	2.61e-05	0.0203665	up
MSTRG.74875.12	91	10	19	2	0	2	0.788276	0.086153	0.160377	0.013855	0	0.010216	4.52965	0.000392611	0.0384034	up
MSTRG.75987.2	384	404	246	0	0	0	3.91326	4.14172	2.49814	0	0	0	10.7407	2.11e-22	8.79e-07	up
MSTRG.76190.1	36	18	48	0	3	1	0.4714	0.231453	0.628093	0	0.028029	0.004516	4.41789	3.65e-06	0.00397136	up
MSTRG.76486.22	93	68	29	0	0	3	0.412446	0.302908	0.126644	0	0	0.011638	5.52405	2.3e-06	0.00318291	up
MSTRG.76790.20	295	0	241	0	0	0	1.33344	0	1.08576	0	0	0	7.83415	0.00034536	0.0371081	up
MSTRG.78988.12	194	336	0	0	0	0	0.251755	0.439767	0	0	0	0	7.80732	0.00034355	0.0383739	up
MSTRG.7909.22	1366	0	865	0	0	0	1.60397	0	1.01163	0	0	0	8.31327	0.00021343	0.0254629	up
MSTRG.79758.13	18	38	33	0	0	0	0.100756	0.220152	0.187582	0	0	0	7.67274	2.71e-08	0.0123235	up
MSTRG.79818.7	0	1492	371	0	0	0	0	0.348699	0.085721	0	0	0	8.12327	0.00031098	0.0317232	up
MSTRG.80233.1	26	25	15	4	3	0	0.223639	0.21756	0.126808	0.028928	0.017533	0	3.08898	0.000254482	0.0488028	up
MSTRG.80622.27	493	509	1273	6	1	1	0.09019	0.093681	0.232302	0.001038	5.5e-05	2.9e-05	7.80419	2.63e-18	4.38e-12	up
MSTRG.81729.3	76	138	37	1	1	8	0.214439	0.392944	0.10349	0.002762	0.001677	0.021634	4.36614	2.96e-05	0.0074025	up
MSTRG.82829.1	52	60	47	18	13	14	0.259584	0.298739	0.233804	0.090816	0.061853	0.067828	1.7465	1.07e-05	0.00609442	up
MSTRG.85952.1	210	455	167	40	60	68	0.299286	0.654419	0.237269	0.057146	0.085281	0.098343	2.21016	0.000201703	0.0277919	up
MSTRG.86653.9	1	1	1551	0	0	1	3.4e-05	2.8e-05	0.693903	0	0	0.000332	7.61351	0.00032144	0.0349004	up
MSTRG.86947.11	340	0	192	0	0	0	0.640494	0	0.359434	0	0	0	7.80762	0.00035646	0.0383739	up
MSTRG.87775.27	11	26	28	0	0	0	0.044341	0.112894	0.120621	0	0	0	7.26325	6.82e-07	0.0274322	up
MSTRG.8821.1	566	616	528	0	0	0	0.955385	1.04558	0.888033	0	0	0	11.4294	7.53e-30	2.95e-08	up
MSTRG.89800.1	47	53	49	17	15	8	0.308267	0.353949	0.320375	0.109334	0.098435	0.049277	1.82297	3.05e-05	0.0140674	up
MSTRG.91665.1	122	150	106	24	40	42	0.251711	0.310866	0.217962	0.048857	0.083017	0.088552	1.75566	2.19e-05	0.00919878	up
MSTRG.91676.16	32	1192	26	1	1	1	0.033689	1.30145	0.027244	2.7e-05	0.000148	0.000138	7.77079	6.07e-06	0.000184731	up
MSTRG.92760.1	41	65	62	0	3	8	0.450498	0.713324	0.670456	0	0.02227	0.088044	3.68725	0.000140801	0.0310495	up
MSTRG.92967.3	199	64	45	10	2	5	0.331543	0.105798	0.07455	0.016066	0.002054	0.008182	3.99417	2.12e-05	0.00525734	up
MSTRG.95614.18	6456	6421	6378	48	0	15	216.024	216.327	212.679	1.60933	0	0.497293	7.61144	1.22e-07	1.43e-05	up
MSTRG.95749.3	20	6	78	0	0	0	0.078323	0.022956	0.306898	0	0	0	7.5382	2.21e-05	0.0243814	up
MSTRG.96313.2	6	20	33	0	0	0	0.07107	0.239122	0.388589	0	0	0	7.04394	1.24e-05	0.0396904	up
MSTRG.96363.1	47	62	163	3	1	3	0.264942	0.351453	0.918514	0.011827	0.002434	0.013798	5.03276	6.36e-09	2.19e-05	up
MSTRG.96370.32	220	23	397	0	0	0	0.936083	0.09681	1.68645	0	0	0	9.66011	1.31e-08	0.000183673	up
MSTRG.96540.8	16	18	29	0	0	3	0.150055	0.179235	0.282056	0	0	0.022442	4.05622	0.000101451	0.0442749	up
MSTRG.96651.2	30	31	61	3	3	4	0.252602	0.264182	0.515009	0.020194	0.017702	0.033632	3.4669	3.03e-07	0.000352086	up
MSTRG.97376.2	10	11	448	0	0	0	0.105265	0.111867	4.95387	0	0	0	8.72424	0.00103044	0.00462085	up
MSTRG.97698.4	368	511	410	0	0	0	0.770172	1.07512	0.85411	0	0	0	11.0525	3.75e-26	1.81e-07	up
MSTRG.98130.9	972	1	1	2	1	2	1.17704	0.000408	0.000908	0.001817	0.000492	0.001759	6.38976	0.00057676	0.0416474	up
MSTRG.99917.36	1606	0	2220	0	0	0	0.20772	0	0.286224	0	0	0	8.32832	0.00027658	0.0260812	up
MSTRG.99917.38	4083	0	6275	0	0	0	0.529088	0	0.810358	0	0	0	8.00858	0.00032657	0.0391288	up
MSTRG.99917.40	1711	0	2771	0	0	0	0.222292	0	0.358846	0	0	0	8.28812	0.00021765	0.0277919	up
MSTRG.100058.1	0	0	3	69	99	58	0	0	0.01115	0.286112	0.408457	0.242526	-6.01946	5.16e-11	2.22e-05	down
MSTRG.100492.3	0	0	0	162	267	0	0	0	0	0.294583	0.480228	0	-7.76948	0.00039845	0.0386966	down
MSTRG.101653.1	8	16	7	28	55	72	0.024289	0.055315	0.020747	0.096737	0.187724	0.252775	-2.35278	0.000408557	0.0414573	down
MSTRG.104098.4	0	0	0	347	1006	870	0	0	0	0.321733	0.920571	0.810416	-11.7019	9.09e-24	2.34e-08	down
MSTRG.1046.43	0	0	0	784	2691	0	0	0	0	0.216813	0.735347	0	-8.21688	0.00030987	0.0303267	down
MSTRG.1046.53	0	0	0	225	67	651	0	0	0	0.166245	0.048755	0.484742	-10.3509	3.51e-11	1.97e-05	down
MSTRG.112746.2	3	2	2	10	22	17	0.024467	0.023541	0.021131	0.111419	0.265818	0.200515	-2.80159	0.000235781	0.0357061	down
MSTRG.113704.17	0	0	10	293	338	215	0	0	0.013401	0.410549	0.467878	0.302283	-5.89891	0.000147681	0.0128145	down
MSTRG.113708.13	0	0	0	52	127	32	0	0	0	0.177284	0.432997	0.111651	-8.71504	6.22e-10	0.00131753	down
MSTRG.113727.15	0	2	0	28	8	18	0	0.018597	0	0.433852	0.122329	0.274348	-4.49384	0.000137484	0.0387125	down
MSTRG.114456.10	0	3	1	57	38	27	0	0.017016	0.001559	0.327164	0.212423	0.152774	-4.81198	5.22e-08	0.000294587	down
MSTRG.114659.1	14	13	14	72	98	26	0.042182	0.039219	0.043854	0.233777	0.315181	0.082625	-2.27006	0.000477795	0.0431159	down
MSTRG.116735.3	0	0	0	13	62	22	0	0	0	0.094434	0.471755	0.165583	-7.74268	5.39e-07	0.0132417	down
MSTRG.119427.2	0	0	0	2	15	48	0	0	0	0.021794	0.191514	0.650728	-7.03987	0.00047688	0.0489645	down
MSTRG.120997.1	0	0	0	10	21	11	0	0	0	0.129627	0.285107	0.151406	-6.86121	5.09e-06	0.0467746	down
MSTRG.123297.14	0	0	2	251	386	564	0	0	0.00323	0.722472	1.09593	1.63198	-8.82877	1.5e-20	5.5e-11	down
MSTRG.125084.10	0	0	0	751	313	0	0	0	0	1.12852	0.46347	0	-8.16201	0.00021657	0.0279925	down
MSTRG.125685.13	31	9	55	202	151	380	0.37897	0.105979	0.658585	2.49982	1.84735	4.73308	-2.95929	0.000283775	0.0306176	down
MSTRG.126384.1	11	19	26	56	73	58	0.047079	0.088021	0.116651	0.263188	0.337723	0.274991	-1.79564	8.81e-05	0.0243811	down
MSTRG.127555.7	0	0	0	361	369	264	0	0	0	0.377972	0.381792	0.277665	-10.8356	1.1e-24	4.78e-07	down
MSTRG.128534.3	0	0	0	65	37	138	0	0	0	0.117239	0.065061	0.248536	-8.89761	1.85e-10	0.000812761	down
MSTRG.128588.21	14	10	37	271	168	76	0.014591	0.010574	0.039043	0.292104	0.17843	0.081918	-3.07199	8.08e-05	0.0140674	down
MSTRG.128588.3	0	1	0	1	44	326	0	7.5e-05	0	0.000199	0.039131	0.298201	-7.14677	9.807e-05	0.0175628	down
MSTRG.128588.4	1518	3945	3091	13988	14478	11592	0.136172	0.356488	0.276407	1.27464	1.30286	1.06124	-2.27728	1.53e-06	0.00100989	down
MSTRG.129405.5	0	0	0	39	62	560	0	0	0	0.018093	0.028765	0.265971	-9.70394	3.94e-07	0.000214768	down
MSTRG.129923.4	12	0	18	80	180	651	0.014017	0	0.020607	0.097233	0.215128	0.795063	-4.64573	0.000987588	0.0478405	down
MSTRG.131064.1	87	99	102	409	596	622	0.088518	0.101506	0.10354	0.42513	0.612294	0.650823	-2.55698	3.21e-15	7.79e-10	down
MSTRG.13262.10	189	203	279	1266	1054	866	0.164805	0.178428	0.243257	1.1263	0.92567	0.773854	-2.30473	6.48e-14	7.94e-09	down
MSTRG.13270.20	25	19	11	1949	625	28	0.016328	0.012397	0.007272	1.33142	0.421592	0.018775	-5.26459	3.61e-05	0.00443113	down
MSTRG.132926.5	1	0	1	35	85	1	5e-06	0	3.3e-05	0.102759	0.250505	9e-06	-5.32452	0.00043259	0.0469813	down
MSTRG.133793.2	1	1	1	1449	689	1376	8.6e-05	7e-06	0.000145	0.307613	0.144374	0.293558	-9.91103	7.11e-35	8.8e-21	down
MSTRG.13440.4	124	88	69	469	340	278	0.193864	0.13925	0.106731	0.749593	0.535792	0.446179	-1.98883	5.12e-06	0.00285491	down
MSTRG.135181.46	0	0	0	250	458	0	0	0	0	0.238986	0.432454	0	-8.02958	0.0003987	0.0309126	down
MSTRG.135465.5	1	0	0	85	97	123	0.000311	0	0	0.104016	0.117482	0.152156	-7.76377	7.49e-16	4.37e-07	down
MSTRG.135623.39	5	0	0	150	345	12	0.004521	0	0	0.153911	0.350898	0.01201	-5.86867	0.00161055	0.0366334	down
MSTRG.135623.55	0	0	0	184	0	199	0	0	0	0.165331	0	0.179795	-7.71939	0.00047689	0.0401639	down
MSTRG.136608.1	32	53	19	442	489	324	0.060656	0.102539	0.035219	0.875813	0.956893	0.644863	-3.60795	8.16e-12	1.06e-07	down
MSTRG.136616.4	3	2	0	126	129	28	0.00556	0.00351	0	0.283292	0.285527	0.061948	-5.57883	1.12e-07	0.000190107	down
MSTRG.136948.1	13	17	7	58	59	45	0.04629	0.062384	0.023193	0.223507	0.225068	0.173141	-2.16548	1.04e-05	0.00611411	down
MSTRG.136959.38	8	0	8	82	51	69	0.054108	0	0.054586	0.569639	0.344488	0.478116	-3.57638	0.000214511	0.0368572	down
MSTRG.139845.7	11	22	18	248	196	78	0.034848	0.069003	0.057835	0.819508	0.640613	0.257986	-3.35971	1.32e-07	0.000135359	down
MSTRG.140055.4	0	0	0	262	73	231	0	0	0	0.204897	0.056409	0.181653	-9.94966	3.22e-14	3.43e-05	down
MSTRG.140060.1	0	0	0	23	147	120	0	0	0	0.050624	0.331455	0.276163	-9.02069	1.6e-09	0.000729565	down
MSTRG.14239.10	0	0	0	0	790	496	0	0	0	0	1.03656	0.661743	-8.26714	0.00021354	0.0254629	down
MSTRG.143170.14	0	0	0	15	17	14	0	0	0	0.218036	0.243427	0.197222	-7.0219	7.77e-07	0.0360641	down
MSTRG.143703.1	0	0	0	19	27	13	0	0	0	0.29012	0.409209	0.196209	-7.28514	3.2e-07	0.0255735	down
MSTRG.143981.3	0	1	0	19	16	8	0	0.007217	0	0.330133	0.276296	0.134488	-5.04325	1.76e-05	0.0246101	down
MSTRG.144285.2	0	0	0	12	29	12	0	0	0	0.152036	0.362115	0.148271	-7.11193	2.24e-06	0.0346319	down
MSTRG.144513.2	0	0	0	296	252	56	0	0	0	2.19894	1.84845	0.417424	-9.94237	6.61e-13	4.28e-05	down
MSTRG.1463.7	0	0	0	214	166	27	0	0	0	0.25579	0.195723	0.031895	-9.38074	4.9e-10	0.000266153	down
MSTRG.147643.12	13	17	9	71	50	31	0.126921	0.166032	0.080819	0.706988	0.491503	0.311565	-1.99142	0.000395929	0.0431159	down
MSTRG.147643.132	27	34	52	265	302	306	0.037326	0.04782	0.072382	0.375214	0.422272	0.435393	-3.0062	4.07e-16	2.96e-10	down
MSTRG.147643.141	139	166	76	359	404	581	0.264215	0.31875	0.144532	0.696503	0.773902	1.13346	-1.86544	0.000200422	0.0296619	down
MSTRG.147643.15	0	0	0	159	53	70	0	0	0	1.52164	0.49845	0.66753	-9.11976	6.93e-12	0.00036782	down
MSTRG.147643.23	0	0	0	47	8	26	0	0	0	0.675667	0.107641	0.377158	-7.52085	2.15e-06	0.0210673	down
MSTRG.147643.24	8	11	16	90	136	114	0.089918	0.127353	0.177911	1.05605	1.58883	1.34874	-3.32174	6.18e-13	2.95e-08	down
MSTRG.147643.43	0	0	0	33	77	30	0	0	0	0.362982	0.839348	0.328392	-8.28307	1.67e-09	0.00336295	down
MSTRG.147643.82	17	40	28	213	83	160	0.158538	0.373696	0.252416	2.02243	0.776195	1.52177	-2.46108	4.82e-05	0.0109294	down
MSTRG.148631.1	0	0	0	370	0	318	0	0	0	0.36395	0	0.31441	-8.03941	0.00034534	0.0306176	down
MSTRG.149242.2	2	0	0	298	921	1	0.013676	0	0	2.35206	7.19764	0.000279	-7.64496	0.00094355	0.00904492	down
MSTRG.152390.1	0	0	0	1601	282	0	0	0	0	0.920497	0.160066	0	-8.07783	0.00035643	0.0343818	down
MSTRG.16311.31	0	0	0	624	468	0	0	0	0	0.348316	0.257992	0	-8.23609	0.00021765	0.0254629	down
MSTRG.16377.12	0	0	0	194	0	103	0	0	0	0.290901	0	0.155195	-7.531	0.00049086	0.0485515	down
MSTRG.16381.4	328	282	251	824	783	591	0.289378	0.250411	0.220466	0.738844	0.693072	0.531942	-1.4042	8.1e-07	0.00128449	down
MSTRG.16545.2	71	66	71	346	176	264	0.129565	0.12165	0.129214	0.648859	0.324478	0.497065	-1.97133	1.11e-06	0.000989178	down
MSTRG.17617.1	2	4	5	21	24	12	0.018482	0.035737	0.049851	0.215635	0.250228	0.118831	-2.39106	0.000425315	0.0485515	down
MSTRG.1773.2	0	0	0	71	49	21	0	0	0	0.28354	0.194449	0.082693	-8.27222	3.09e-09	0.00357926	down
MSTRG.18943.13	0	0	0	0	937	786	0	0	0	0	0.636457	0.542971	-8.35343	0.00029879	0.0241849	down
MSTRG.18943.3	0	0	0	3	2	168	0	0	0	0.001824	0.00089	0.128317	-7.61458	0.00034654	0.0346652	down
MSTRG.19359.1	0	0	0	0	508	1587	0	0	0	0	1.84827	5.87756	-8.22489	0.00027685	0.0284775	down
MSTRG.19732.1	0	0	0	44	3	48	0	0	0	0.188216	0.008533	0.207457	-7.53311	3.49e-05	0.0251653	down
MSTRG.19900.22	4	2	1	62	59	13	0.02487	0.014828	0.007856	0.50656	0.479802	0.102713	-4.13841	1.41e-05	0.00494019	down
MSTRG.19949.13	0	0	0	0	373	1748	0	0	0	0	0.2023	0.964452	-8.10962	0.00034535	0.0335171	down
MSTRG.19949.17	0	0	0	334	362	298	0	0	0	1.07226	1.14988	0.962643	-10.8544	1.22e-25	4.21e-07	down
MSTRG.20042.15	0	0	0	4502	0	1557	0	0	0	1.62229	0	0.563493	-8.10212	0.0003987	0.035183	down
MSTRG.20426.8	1	1	1	1	129	82	0.000316	1e-06	1e-06	0	0.179631	0.115365	-5.64937	9.878e-05	0.0167358	down
MSTRG.20829.1	0	3	0	2170	3163	5	0	0.008587	0	9.35947	13.476	0.017456	-8.98441	0.00543481	0.000612875	down
MSTRG.21532.6	571	567	1460	3727	5719	3851	0.57759	0.577462	1.47227	3.83038	5.80493	3.97663	-2.40187	1.75e-05	0.00520312	down
MSTRG.25327.5	0	0	0	30	13	9	0	0	0	0.203111	0.085495	0.059839	-7.05934	5.07e-06	0.0377934	down
MSTRG.25881.3	0	0	0	76	603	557	0	0	0	0.077689	0.61281	0.575633	-10.7157	5.11e-13	4.48e-06	down
MSTRG.29590.15	0	0	0	1241	591	1600	0	0	0	0.612677	0.287869	0.79374	-12.2722	1.02e-27	1.47e-09	down
MSTRG.29639.3	0	0	0	14	155	68	0	0	0	0.042957	0.491027	0.2178	-8.67702	1.04e-07	0.00216134	down
MSTRG.29755.1	2	0	0	12	26	18	0.0591	0	0	0.370589	0.814953	0.572672	-4.57761	1.53e-05	0.0171635	down
MSTRG.30619.2	0	0	0	114	107	340	0	0	0	0.117975	0.109316	0.355148	-9.92727	1.09e-13	3.92e-05	down
MSTRG.30620.3	7	5	5	70	26	75	0.023483	0.014256	0.014111	0.246924	0.090008	0.267169	-3.33528	1.96e-06	0.00112331	down
MSTRG.3104.2	0	0	0	147	122	0	0	0	0	0.265985	0.218064	0	-7.48773	0.00048798	0.0495313	down
MSTRG.32082.2	0	0	0	1085	0	4451	0	0	0	0.66375	0	2.73519	-7.9861	0.00039807	0.0394767	down
MSTRG.33345.5	0	0	0	0	171	187	0	0	0	0	0.809173	0.903584	-7.67816	0.00047686	0.0416474	down
MSTRG.33431.39	0	0	0	805	0	170	0	0	0	1.13417	0	0.239778	-7.98843	0.00034654	0.0351752	down
MSTRG.34872.2	0	0	0	335	233	0	0	0	0	0.959879	0.660447	0	-7.9369	0.00037687	0.033785	down
MSTRG.36.1	6	10	1	52	109	36	0.044824	0.073449	0.007321	0.397315	0.828753	0.273183	-3.46406	0.000109676	0.0204684	down
MSTRG.37089.2	0	0	0	891	0	493	0	0	0	0.614179	0	0.341676	-8.27184	0.00027656	0.0254629	down
MSTRG.37239.9	0	0	0	1	83	14	0	0	0	0.002908	0.314643	0.05379	-7.25001	0.00043259	0.0433672	down
MSTRG.40581.4	0	0	0	15	19	10	0	0	0	0.123682	0.150204	0.080754	-6.9384	2.15e-06	0.0413786	down
MSTRG.41595.5	0	0	0	18	23	63	0	0	0	0.21148	0.269047	0.773319	-7.87833	1.42e-07	0.00930902	down
MSTRG.41646.1	1	0	2	15	941	3299	0.003299	0	0.008733	0.099364	6.39812	22.8318	-9.33618	1.69e-05	9.87e-06	down
MSTRG.41646.10	175	131	644	1398	4344	6839	5.80659	4.36968	21.3182	47.1929	144.855	232.027	-3.70485	5.81e-05	0.00923762	down
MSTRG.41646.11	880	655	1007	4725	45793	29733	7.40161	5.54539	8.44539	40.3661	386.417	255.243	-4.90346	1.86e-08	1.97e-05	down
MSTRG.41646.26	0	0	0	1	15099	1802	0	0	0	2.8e-05	130.158	15.7999	-10.9038	0.00011876	0.000118949	down
MSTRG.41646.3	0	0	1	7138	0	878	0	0	2.8e-05	82.9934	0	10.2513	-8.53512	0.00012495	0.0162094	down
MSTRG.41715.51	1	0	1	242	8	2	0.008437	0	0.005223	3.6835	0.117418	0.026002	-6.08781	0.00038562	0.035183	down
MSTRG.41715.53	2	2	6	20	24	18	0.044578	0.039103	0.152066	0.549588	0.636501	0.495878	-2.6512	7.34e-05	0.0238023	down
MSTRG.41715.94	61	31	29	477	432	433	1.78891	0.905373	0.843455	14.301	12.7919	13.0355	-3.49592	2.49e-14	2.21e-09	down
MSTRG.41716.28	1	2	0	32	13	56	0.00597	0.007523	0	0.233944	0.088738	0.41281	-4.87769	6.74e-06	0.00471515	down
MSTRG.41716.36	0	0	0	32	49	44	0	0	0	0.420784	0.640773	0.591951	-8.23521	1.29e-10	0.00323546	down
MSTRG.41716.85	5	0	5	44	43	22	0.052957	0	0.048215	0.474487	0.461865	0.238878	-3.37972	0.000148149	0.035183	down
MSTRG.41718.1	5	6	2	26	39	14	0.109408	0.132118	0.045129	0.582586	0.871582	0.312777	-2.59341	0.000455096	0.0469813	down
MSTRG.41999.5	0	0	0	20	17	19	0	0	0	0.284296	0.244014	0.275941	-7.26435	1.55e-07	0.0254629	down
MSTRG.42220.1	0	0	0	9	29	10	0	0	0	0.097344	0.336302	0.115409	-6.94945	1.08e-05	0.0433672	down
MSTRG.43351.1	24	17	27	62	49	57	0.606213	0.421854	0.670204	1.57088	1.22042	1.46289	-1.36357	0.000365467	0.0499477	down
MSTRG.44319.2	0	3	0	16	30	19	0	0.019991	0	0.152655	0.2897	0.190913	-4.24941	4.55e-05	0.0308761	down
MSTRG.44329.1	101	140	89	397	321	560	0.07753	0.108713	0.068286	0.310587	0.247547	0.440398	-2.01001	2.97e-06	0.00192848	down
MSTRG.45158.7	0	0	0	64	20	42	0	0	0	0.427905	0.132955	0.282168	-8.14767	7.1e-09	0.00475628	down
MSTRG.4777.5	0	0	0	106	235	75	0	0	0	0.173024	0.380082	0.122741	-9.59106	1.26e-13	9.73e-05	down
MSTRG.47856.14	0	0	0	429	857	0	0	0	0	0.36084	0.712735	0	-8.25082	0.00026543	0.0256837	down
MSTRG.48198.10	0	0	0	291	662	856	0	0	0	0.312835	0.704886	0.927111	-11.4461	2.7e-22	7.18e-08	down
MSTRG.48198.9	0	0	0	361	188	186	0	0	0	0.290812	0.14934	0.150526	-10.3827	3.55e-19	4.5e-06	down
MSTRG.4841.23	0	0	0	1166	0	445	0	0	0	1.34341	0	0.515435	-8.24879	0.00028578	0.0269204	down
MSTRG.48919.4	0	0	0	271	83	0	0	0	0	0.212055	0.063938	0	-7.57419	0.00045645	0.0478687	down
MSTRG.51657.1	0	0	0	23	5	31	0	0	0	0.251807	0.044064	0.335392	-7.1392	1.5e-05	0.0366334	down
MSTRG.51748.10	0	0	0	14	13	15	0	0	0	0.145541	0.138874	0.156941	-6.91213	1.61e-06	0.0416474	down
MSTRG.51748.2	0	0	0	26	30	44	0	0	0	0.071008	0.080738	0.120907	-7.94855	2.58e-09	0.00637336	down
MSTRG.51748.24	0	0	0	48	32	53	0	0	0	0.105414	0.069865	0.117494	-8.30214	1.22e-10	0.00285263	down
MSTRG.51748.3	0	0	0	13	25	18	0	0	0	0.076596	0.150069	0.111777	-7.23054	4.14e-07	0.0277919	down
MSTRG.51748.8	0	0	0	22	28	47	0	0	0	0.068578	0.086769	0.150948	-7.88339	1.09e-08	0.00793302	down
MSTRG.51852.9	0	0	0	398	1	7	0	0	0	0.69172	0.001135	0.010948	-8.20902	0.00012987	0.0182614	down
MSTRG.51974.6	0	0	0	89	171	9	0	0	0	0.205674	0.393901	0.019302	-8.72082	6.11e-07	0.00225824	down
MSTRG.52146.15	0	0	0	246	0	189	0	0	0	0.693933	0	0.534501	-7.79071	0.00038675	0.0383263	down
MSTRG.52231.12	0	1	0	1652	1443	0	0	1e-06	0	0.482224	0.416209	0	-8.38329	0.00016547	0.0132417	down
MSTRG.52775.19	0	0	0	13444	10487	7032	0	0	0	5.11603	3.94079	2.68846	-15.1966	6.08e-61	4.83e-18	down
MSTRG.54608.1	7	6	9	87	62	53	0.024452	0.022068	0.02918	0.32061	0.225884	0.197305	-3.22903	1.16e-10	1.15e-06	down
MSTRG.5470.5	91	56	48	263	363	314	0.187114	0.115272	0.097575	0.550685	0.751418	0.660123	-2.30793	7.44e-08	0.000141842	down
MSTRG.55985.11	0	0	0	46	51	60	0	0	0	0.216317	0.236642	0.28537	-8.53026	5.31e-12	0.00150198	down
MSTRG.56599.1	0	0	0	129	46	121	0	0	0	0.278165	0.096363	0.262143	-9.19879	2.34e-12	0.000280176	down
MSTRG.56992.3	10	9	5	158	159	305	0.016646	0.014852	0.008362	0.291262	0.289667	0.565702	-4.696	1.29e-14	7.79e-10	down
MSTRG.59083.21	0	0	0	1280	0	1196	0	0	0	0.668774	0	0.627876	-8.39039	0.00021345	0.0241251	down
MSTRG.59822.12	0	0	0	0	333	205	0	0	0	0	0.717011	0.449701	-7.89782	0.00038573	0.0350858	down
MSTRG.60161.2	0	1	0	59	16	98	0	0.002451	0	0.187496	0.048434	0.311322	-6.81163	1.47e-07	0.000866539	down
MSTRG.60674.12	0	0	0	1517	745	0	0	0	0	0.876774	0.424771	0	-8.34932	0.00027584	0.024857	down
MSTRG.60746.4	0	0	0	577	1660	0	0	0	0	0.225708	0.64162	0	-8.28277	0.00026879	0.0266962	down
MSTRG.61405.5	0	0	0	730	856	569	0	0	0	0.64739	0.749584	0.507162	-11.8129	1.18e-31	5.87e-09	down
MSTRG.626.36	0	0	0	5019	4881	0	0	0	0	0.826859	0.794074	0	-8.08836	0.00034768	0.036059	down
MSTRG.63187.26	0	0	9	516	307	411	0	0	0.00406	0.247695	0.145681	0.198112	-6.56277	1.72e-05	0.00225824	down
MSTRG.63187.27	0	0	0	1566	722	1173	0	0	0	0.757902	0.34513	0.570441	-12.3392	3.81e-31	7.79e-10	down
MSTRG.6360.2	0	0	0	126	229	99	0	0	0	0.218834	0.392294	0.171709	-9.76404	9.35e-16	4.48e-05	down
MSTRG.64717.10	42	13	76	2551	2625	79	0.026265	0.008082	0.048225	1.65536	1.68189	0.051321	-5.0747	4.23e-05	0.00520437	down
MSTRG.64717.15	0	0	0	504	52	161	0	0	0	0.378696	0.037885	0.121615	-10.0069	1.4e-10	5.53e-05	down
MSTRG.64856.3	0	0	0	84	95	92	0	0	0	0.345033	0.387482	0.382972	-9.21929	1.64e-15	0.000184134	down
MSTRG.65941.22	7	6	0	1204	2396	1091	0.002446	0.002159	0	0.462874	0.909349	0.421105	-8.19498	2.26e-17	1.97e-11	down
MSTRG.67103.4	275	236	183	477	594	537	0.240772	0.207653	0.159256	0.42406	0.52209	0.480005	-1.26638	5.32e-05	0.018605	down
MSTRG.67646.5	0	0	0	250	0	312	0	0	0	3.58568	0	4.5	-7.93454	0.00037645	0.0340395	down
MSTRG.68205.1	0	0	0	0	207	387	0	0	0	0	2.47433	4.71676	-7.93536	0.00034876	0.0343818	down
MSTRG.70759.28	0	0	0	57	48	131	0	0	0	0.521293	0.432492	1.21317	-8.91688	3.67e-11	0.00070709	down
MSTRG.71117.21	1	0	0	62	1	88	0.000909	0	0	0.433319	2.6e-05	0.612178	-6.24582	0.00038768	0.0332355	down
MSTRG.72741.32	0	0	0	760	0	795	0	0	0	0.509938	0	0.536053	-8.33165	0.00029876	0.0243814	down
MSTRG.73129.28	0	0	0	8	11	984	0	0	0	0.003288	0.004343	0.423452	-9.31948	0.00916746	0.00215663	down
MSTRG.73997.14	0	0	0	97	6	42	0	0	0	0.770742	0.046835	0.331015	-8.0332	5.14e-06	0.00934729	down
MSTRG.74095.7	0	0	0	31	20	42	0	0	0	0.420799	0.271609	0.5818	-7.83916	1.15e-08	0.00870598	down
MSTRG.74448.9	0	0	0	30	6	18	0	0	0	0.450864	0.077362	0.273251	-7.06519	1.1e-05	0.0387125	down
MSTRG.74500.1	0	0	0	8	22	16	0	0	0	0.146398	0.394727	0.301434	-6.95337	4.62e-06	0.0416835	down
MSTRG.75647.6	0	0	0	239	26	5	0	0	0	0.401757	0.042499	0.006799	-8.43421	0.000143261	0.00622769	down
MSTRG.75950.1	0	2	2	18	16	23	0	0.025524	0.020502	0.248435	0.221615	0.32548	-3.78509	5.89e-06	0.00606671	down
MSTRG.76083.28	0	0	0	69	49	31	0	0	0	0.474524	0.327889	0.213211	-8.40619	1.32e-10	0.00229551	down
MSTRG.76083.32	13	25	15	42	100	98	0.052329	0.103337	0.059312	0.176319	0.41495	0.413733	-2.21789	0.000226439	0.0306569	down
MSTRG.76089.6	0	0	0	25	25	13	0	0	0	0.424972	0.432852	0.217734	-7.36558	1.85e-07	0.0232691	down
MSTRG.76426.1	0	0	0	12	6	51	0	0	0	0.118266	0.058467	0.507099	-7.23911	3.96e-05	0.0350858	down
MSTRG.76426.2	0	0	0	29	9	19	0	0	0	0.33687	0.092667	0.211478	-7.19117	2.02e-06	0.0310495	down
MSTRG.7909.17	1	0	0	0	113	2231	5.3e-05	0	0	0	0.084813	1.71475	-7.74659	0.00032872	0.0375223	down
MSTRG.79123.3	0	0	0	65	140	136	0	0	0	0.13797	0.29523	0.292139	-9.41885	3.3e-14	0.000133289	down
MSTRG.79818.8	2319	2311	2245	4442	3933	6036	0.488372	0.490195	0.47122	0.949941	0.830564	1.29687	-1.13413	0.000244039	0.0393465	down
MSTRG.82.8	43	32	45	184	199	114	0.262671	0.19973	0.275444	1.16087	1.2436	0.719667	-2.09517	1.19e-07	0.000210264	down
MSTRG.83337.1	0	0	3	49	14	20	0	0	0.029701	0.534912	0.141911	0.218569	-4.53756	0.000194853	0.0394767	down
MSTRG.83409.2	9	4	10	61	18	95	0.032873	0.013253	0.038355	0.245423	0.070511	0.386297	-2.91888	0.00056443	0.0446434	down
MSTRG.83428.5	0	0	0	15	15	32	0	0	0	0.152336	0.145617	0.326192	-7.32606	5.77e-07	0.0254629	down
MSTRG.90129.1	0	0	0	30	51	27	0	0	0	0.37028	0.623411	0.326069	-8.02516	1.76e-09	0.00552218	down
MSTRG.90129.3	0	0	0	12	8	39	0	0	0	0.138603	0.084229	0.469942	-7.14887	1.41e-05	0.036059	down
MSTRG.9021.2	0	0	0	0	154	147	0	0	0	0	0.312219	0.302697	-7.56747	0.00049786	0.0464857	down
MSTRG.91676.3	0	0	0	511	261	0	0	0	0	0.377553	0.190364	0	-8.06207	0.00038799	0.030451	down
MSTRG.93888.3	0	0	0	102	111	30	0	0	0	0.240609	0.258619	0.070369	-8.90292	9.44e-11	0.000767771	down
MSTRG.95766.18	0	0	1	463	0	253	0	0	0.000337	0.25429	0	0.139406	-7.29784	0.00039453	0.0375223	down
MSTRG.95875.11	211	120	175	700	359	559	0.360784	0.205441	0.297501	1.21626	0.615283	0.974915	-1.72599	0.000213959	0.0310495	down
MSTRG.95881.1	102	67	65	269	199	213	0.460914	0.30585	0.294509	1.24358	0.907197	0.987679	-1.58995	2.24e-05	0.00924323	down
MSTRG.95912.3	0	0	0	306	108	185	0	0	0	1.27479	0.440962	0.771967	-10.0774	3.45e-16	1.88e-05	down
MSTRG.96133.9	0	0	0	10	143	1	0	0	0	0.081421	1.17757	0.002032	-7.5617	0.00032187	0.0343818	down
MSTRG.96534.4	2	5	7	20	26	31	0.040088	0.120818	0.190907	0.567149	0.728524	0.867079	-2.49432	8.63e-05	0.024074	down
MSTRG.97376.26	1	1	0	19	1	146	3e-06	0.001607	0	0.106791	0	0.834775	-5.66846	0.00043276	0.0469761	down
MSTRG.97376.5	0	0	0	2	37	34	0	0	0	0.018792	0.64926	0.614057	-7.20242	0.0009462	0.0387125	down
MSTRG.97380.28	2	2	1	1	292	268	0.014866	0.015336	0.006039	0.006267	3.12805	2.91363	-6.2378	5.487e-05	0.00586764	down
MSTRG.97380.29	0	0	3	119	163	62	0	0	0.022276	1.33133	1.80913	0.692936	-6.53746	2.64e-10	1.99e-05	down
MSTRG.97698.8	0	0	0	179	17	12	0	0	0	0.387875	0.036	0.025716	-8.31261	1.65e-05	0.00630748	down
MSTRG.99633.15	0	0	0	783	0	5103	0	0	0	0.305896	0	2.00476	-7.78637	0.00049174	0.0495313	down
MSTRG.99917.29	0	0	0	0	1306	113	0	0	0	0	0.122337	0.010707	-7.81083	0.00043987	0.0446434	down
MSTRG.99917.35	0	0	0	2291	0	856	0	0	0	0.299809	0	0.112493	-8.27334	0.00029131	0.0277919	down
MSTRG.99917.37	0	0	0	4505	842	1094	0	0	0	0.591994	0.109187	0.144331	-12.7906	5.77e-21	6.69e-10	down
MSTRG.99917.39	1	0	1	2912	1364	849	3e-06	0	6e-06	0.380813	0.176116	0.111452	-10.781	2.7e-29	4.96e-17	down

## Sheet: DEMs
Table S5b. 73 differentially expressed miRNAs (DE miRNAs).
miRNA ID	TC1_Count	TC2_Count	TC3_Count	CH1_Count	CH2_Count	CH3_Count	TC1_TPM	TC2_TPM	TC3_TPM	CH1_TPM	CH2_TPM	CH3_TPM	log2FC	P value	FDR	Regulated
gga-miR-302a	56	356	118	33	46	113	2.29832	15.6288	5.18041	1.54603	2.23104	5.03155	1.00323	0.0421904	0.613252	up
novel_miR_676	21	16	15	6	7	6	0.86187	0.702417	0.658527	0.281096	0.339506	0.267162	1.00649	0.0320709	0.586581	up
gga-miR-302c-3p	53	288	90	32	49	78	2.1752	12.6435	3.95116	1.49918	2.37655	3.4731	1.01582	0.032159	0.586581	up
novel_miR_567	2	4	3	0	0	0	0.0820828	0.175604	0.131705	0	0	0	1.01681	0.0493242	0.695859	up
gga-miR-302d	80	519	159	51	63	148	3.28331	22.7847	6.98038	2.38932	3.05556	6.58999	1.06889	0.0280926	0.561462	up
gga-miR-726-3p	47	52	40	12	23	18	1.92895	2.28286	1.75607	0.562192	1.11552	0.801486	1.08352	0.00336273	0.158162	up
novel_miR_728	8	0	10	0	0	0	0.328331	0	0.439018	0	0	0	1.09736	0.0346694	0.586581	up
novel_miR_194	4	3	3	0	0	0	0.164166	0.131703	0.131705	0	0	0	1.1094	0.0355723	0.586581	up
novel_miR_348	4	3	3	0	0	0	0.164166	0.131703	0.131705	0	0	0	1.1094	0.0355723	0.586581	up
novel_miR_262	4	1	7	0	0	0	0.164166	0.0439011	0.307312	0	0	0	1.12098	0.0333292	0.586581	up
novel_miR_367	8	14	20	3	6	3	0.328331	0.614615	0.878035	0.140548	0.291006	0.133581	1.12609	0.0324782	0.586581	up
gga-miR-6608-3p	34	13	26	8	9	7	1.39541	0.570714	1.14145	0.374795	0.436508	0.311689	1.12729	0.0153622	0.387829	up
novel_miR_760	21	28	17	14	2	3	0.86187	1.22923	0.74633	0.65589	0.0970019	0.133581	1.12942	0.031699	0.586581	up
novel_miR_161	3	3	8	1	0	0	0.123124	0.131703	0.351214	0.0468493	0	0	1.13287	0.0410163	0.613252	up
novel_miR_708	3	4	7	0	1	0	0.123124	0.175604	0.307312	0	0.0485009	0	1.1614	0.0370359	0.592162	up
novel_miR_110	3	7	4	1	0	0	0.123124	0.307308	0.175607	0.0468493	0	0	1.16544	0.0363606	0.587898	up
novel_miR_170	60	42	64	30	16	12	2.46249	1.84385	2.80971	1.40548	0.776015	0.534324	1.16761	0.00272423	0.140006	up
novel_miR_751	8	13	16	6	2	0	0.328331	0.570714	0.702428	0.281096	0.0970019	0	1.17677	0.0358715	0.586581	up
novel_miR_319	103	92	88	60	10	22	4.22727	4.0389	3.86336	2.81096	0.485009	0.979594	1.18536	0.00789688	0.291374	up
gga-miR-6699-5p	4	6	9	1	1	1	0.164166	0.263407	0.395116	0.0468493	0.0485009	0.044527	1.20282	0.0348016	0.586581	up
novel_miR_587	13	17	15	4	6	2	0.533538	0.746318	0.658527	0.187397	0.291006	0.089054	1.2435	0.0150702	0.387251	up
novel_miR_585	15	24	36	14	1	2	0.615621	1.05363	1.58046	0.65589	0.0485009	0.089054	1.24648	0.0229857	0.486419	up
gga-miR-302b-3p	62	504	146	52	52	100	2.54457	22.1261	6.40966	2.43616	2.52205	4.4527	1.26689	0.00959982	0.32158	up
novel_miR_596	4	4	4	0	0	0	0.164166	0.175604	0.175607	0	0	0	1.26771	0.0193388	0.434821	up
novel_miR_498	21	9	21	7	0	4	0.86187	0.39511	0.921937	0.327945	0	0.178108	1.27261	0.0205879	0.448879	up
novel_miR_327	11	9	31	7	1	2	0.451456	0.39511	1.36095	0.327945	0.0485009	0.089054	1.32712	0.0164183	0.391891	up
gga-miR-7449-3p	3	7	8	1	0	0	0.123124	0.307308	0.351214	0.0468493	0	0	1.38148	0.0144068	0.387251	up
gga-miR-6545-5p	5	8	5	0	0	1	0.205207	0.351209	0.219509	0	0	0.044527	1.42799	0.0116939	0.346138	up
gga-miR-6606-5p	1034	927	873	274	274	351	42.4368	40.6963	38.3262	12.8367	13.2893	15.629	1.45934	5.47e-16	2.62e-13	up
novel_miR_918	10	17	5	3	0	0	0.410414	0.746318	0.219509	0.140548	0	0	1.47643	0.00960942	0.32158	up
novel_miR_71	28	9	13	1	3	5	1.14916	0.39511	0.570723	0.0468493	0.145503	0.222635	1.47966	0.00624086	0.242719	up
novel_miR_579	4	4	10	0	0	0	0.164166	0.175604	0.439018	0	0	0	1.56221	0.00513051	0.210937	up
novel_miR_85	16	18	8	0	4	1	0.656663	0.79022	0.351214	0	0.194004	0.044527	1.63395	0.00350652	0.158162	up
gga-miR-6552-3p	17	3	33	1	0	3	0.697704	0.131703	1.44876	0.0468493	0	0.133581	1.71812	0.00253399	0.135052	up
novel_miR_398	12	21	7	2	0	2	0.492497	0.921923	0.307312	0.0936986	0	0.089054	1.74223	0.00189592	0.109129	up
gga-miR-302b-5p	71	668	180	45	43	73	2.91394	29.3259	7.90232	2.10822	2.08554	3.25047	1.78008	0.000316782	0.03039	up
novel_miR_125	10	6	7	0	0	0	0.410414	0.263407	0.307312	0	0	0	1.8911	0.00087221	0.0627555	up
novel_miR_461	10	6	7	0	0	0	0.410414	0.263407	0.307312	0	0	0	1.8911	0.00087221	0.0627555	up
novel_miR_853	76	72	83	11	17	19	3.11915	3.16088	3.64385	0.515343	0.824516	0.846013	1.9335	6.02e-09	1.44e-06	up
gga-miR-1628	30	23	27	6	0	0	1.23124	1.00973	1.18535	0.281096	0	0	2.17777	6.46e-05	0.00664221	up
novel_miR_640	19	6	12	0	0	0	0.779787	0.263407	0.526821	0	0	0	2.30953	5.07e-05	0.0060848	up
novel_miR_819	85	57	38	5	0	5	3.48852	2.50236	1.66827	0.234247	0	0.222635	2.99067	4.67e-10	1.34e-07	up
novel_miR_458	23	16	31	0	0	1	0.943953	0.702417	1.36095	0	0	0.044527	2.9936	4.44e-08	9.12e-06	up
novel_miR_656	36	35	64	0	0	1	1.47749	1.53654	2.80971	0	0	0.044527	3.79978	3.52e-13	1.27e-10	up
novel_miR_790	198	169	163	9	1	4	8.1262	7.41928	7.15599	0.421644	0.0485009	0.178108	4.35231	2.6e-30	1.87e-27	up
novel_miR_714	624	651	536	1	0	3	25.6098	28.5796	23.5313	0.0468493	0	0.133581	6.85932	8.12e-67	1.17e-63	up
gga-miR-1551-3p	0	1	1	16	18	10	0	0.0439011	0.0439018	0.749589	0.873017	0.44527	-2.47711	7.55e-06	0.00108598	down
gga-miR-1551-5p	17	19	90	355	217	292	0.697704	0.834121	3.95116	16.6315	10.5247	13.0019	-2.35645	1.85e-07	3.33e-05	down
novel_miR_693	34	16	32	37	106	299	1.39541	0.702417	1.40486	1.73342	5.1411	13.3136	-1.95415	6.03e-05	0.00664221	down
novel_miR_146	0	0	0	16	1	16	0	0	0	0.749589	0.0485009	0.712432	-1.92375	0.000667089	0.0564671	down
novel_miR_422	3	1	0	3	24	21	0.123124	0.0439011	0	0.140548	1.16402	0.935067	-1.8649	0.00101736	0.0665446	down
gga-miR-7442-5p	3	1	0	12	9	12	0.123124	0.0439011	0	0.562192	0.436508	0.534324	-1.80999	0.00117324	0.0703453	down
novel_miR_775	0	1	0	4	4	14	0	0.0439011	0	0.187397	0.194004	0.623378	-1.63581	0.00396127	0.172735	down
novel_miR_225	1	0	0	5	2	13	0.0410414	0	0	0.234247	0.0970019	0.578851	-1.49171	0.00814079	0.292865	down
novel_miR_647	1	0	0	8	5	3	0.0410414	0	0	0.374795	0.242505	0.133581	-1.42938	0.0113015	0.346138	down
novel_miR_747	1	2	3	0	20	28	0.0410414	0.0878022	0.131705	0	0.970019	1.24676	-1.38507	0.0150118	0.387251	down
novel_miR_10	1	0	1	5	6	5	0.0410414	0	0.0439018	0.234247	0.291006	0.222635	-1.35216	0.017606	0.402142	down
novel_miR_649	0	0	0	11	1	3	0	0	0	0.515343	0.0485009	0.133581	-1.31349	0.0148512	0.387251	down
novel_miR_589	0	17	2	71	31	6	0	0.746318	0.0878035	3.3263	1.50353	0.267162	-1.2835	0.0243606	0.508041	down
novel_miR_815	5	3	1	13	5	16	0.205207	0.131703	0.0439018	0.609041	0.242505	0.712432	-1.28156	0.0198524	0.439501	down
novel_miR_387	1	1	3	3	8	13	0.0410414	0.0439011	0.131705	0.140548	0.388007	0.578851	-1.27022	0.0251796	0.510329	down
novel_miR_738	2	2	3	10	2	18	0.0820828	0.0878022	0.131705	0.468493	0.0970019	0.801486	-1.23665	0.0285586	0.562956	down
novel_miR_669	0	2	1	4	4	10	0	0.0878022	0.0439018	0.187397	0.194004	0.44527	-1.21694	0.0327041	0.586581	down
novel_miR_867	0	2	3	1	6	25	0	0.0878022	0.131705	0.0468493	0.291006	1.11317	-1.17438	0.0384289	0.601078	down
novel_miR_882	2	2	1	6	4	10	0.0820828	0.0878022	0.0439018	0.281096	0.194004	0.44527	-1.16564	0.0393945	0.609555	down
gga-miR-460b-3p	16	9	11	15	24	51	0.656663	0.39511	0.482919	0.70274	1.16402	2.27088	-1.15999	0.0131364	0.370654	down
novel_miR_703	0	4	0	13	4	7	0	0.175604	0	0.609041	0.194004	0.311689	-1.15825	0.0415244	0.613252	down
gga-miR-460b-5p	260	244	234	331	535	653	10.6708	10.7119	10.273	15.5071	25.948	29.0761	-1.13186	1.69e-05	0.0022135	down
novel_miR_721	1	1	0	3	4	6	0.0410414	0.0439011	0	0.140548	0.194004	0.267162	-1.12375	0.04694	0.668779	down
novel_miR_359	19	11	17	34	34	32	0.779787	0.482912	0.74633	1.59288	1.64903	1.42486	-1.09753	0.00351716	0.158162	down
novel_miR_59	15	18	9	18	16	68	0.615621	0.79022	0.395116	0.843288	0.776015	3.02783	-1.05621	0.033656	0.586581	down
gga-miR-155	69	113	32	167	188	94	2.83186	4.96082	1.40486	7.82384	9.11817	4.18554	-1.04178	0.010306	0.337052	down
novel_miR_464	1572	2226	2131	3872	3254	4057	64.5171	97.7238	93.5547	181.401	157.822	180.646	-1.03293	5.3e-07	8.48e-05	down

## Sheet: DEGs
Table S5c. 354 differentially expressed mRNAs (DE genes).
Gene ID	Gene symbol	TC1_Count	TC2_Count	TC3_Count	CH1_Count	CH2_Count	CH3_Count	TC1_FPKM	TC2_FPKM	TC3_FPKM	CH1_FPKM	CH2_FPKM	CH3_FPKM	log2FoldChange	P value	Padj	Regulated
ENSGALG00000001592	ACER1	78	101	115	44	22	46	0.491079	0.619817	0.699783	0.2648	0.126616	0.286947	1.51106	0.00317428	0.108163	up
ENSGALG00000001690	GABRB2	1524	2174	1249	455	641	385	1.8385	1.68016	2.29777	0.345478	0.976084	0.756148	1.46611	1.74194e-12	2.50209e-09	up
ENSGALG00000001866	MCHR2	141	103	147	118	78	38	1.15396	0.839188	0.662448	0.645639	0.426041	0.154701	1.00984	0.00283444	0.10198	up
ENSGALG00000002132	KCNIP1	312	470	584	261	149	252	0.510486	0.811244	0.880445	0.427158	0.245415	0.44261	1.63088	0.000893126	0.0516326	up
ENSGALG00000003285	CDHR2	24	41	31	2	12	6	0.063749	0.111615	0.083302	0.005488	0.032891	0.015247	1.6293	0.00949665	0.205244	up
ENSGALG00000003286	ACSBG1	349	456	386	148	122	92	0.719482	0.939465	1.3644	0.35644	0.238104	0.444048	1.11536	1.98236e-07	9.02845e-05	up
ENSGALG00000003816	NT5C1A	102	126	168	168	143	93	0.418382	0.522079	0.753932	0.845891	0.692966	0.461983	2.79585	1.74213e-48	3.25309e-44	up
ENSGALG00000003925	MYPN	4	5	5	8	0	2	0.014525	0.015181	0.018457	0.035788	0	0.003845	1.75698	0.000272638	0.0249576	up
ENSGALG00000004251	ARR3	0	4	3	4	0	0	0	0.031272	0.01882	0.034641	0	0	1.05128	0.00131421	0.0640325	up
ENSGALG00000004261	AQP9	38	28	17	21	6	33	0.093081	0.069253	0.039269	0.050106	0.012403	0.080603	1.51017	1.36789e-06	0.000383724	up
ENSGALG00000004631	DRAXIN	14	31	37	15	10	11	0.076433	0.173185	0.201674	0.079668	0.055201	0.060601	1.63258	0.0416426	0.436971	up
ENSGALG00000005170	HRH3	32	31	43	16	19	20	0.280365	0.274653	0.372589	0.134602	0.162279	0.178308	1.15488	0.0310119	0.385542	up
ENSGALG00000005212	GHRHR	4	10	13	7	6	3	0.024942	0.27107	0.127975	0.206074	0.119672	0.01313	2.41582	0.0398176	0.426196	up
ENSGALG00000006018	-	14	23	21	2	11	4	0.095171	0.162535	0.145869	0.013029	0.075505	0.0259	1.2162	0.0440879	0.449882	up
ENSGALG00000006130	STMN3	14	14	13	2	0	0	0.158209	0.155697	0.146329	0.022331	0	0	4.46494	0.00231412	0.0909718	up
ENSGALG00000006216	MYOD1	121	53	116	37	34	29	0.91679	0.400014	0.872066	0.27844	0.25425	0.217974	1.41428	8.56925e-05	0.0101274	up
ENSGALG00000006710	RAB36	69	78	73	49	19	36	0.336817	0.398706	0.477415	0.442024	0.089217	0.243587	1.11465	0.0159844	0.26987	up
ENSGALG00000006834	CPB1	12	18	12	22	33	25	0.095095	0.144517	0.099147	0.183683	0.578814	0.206171	1.12622	0.00935919	0.203451	up
ENSGALG00000007114	APOA1	11841	19844	10034	4222	7480	7659	106.493	179.69	89.9262	38.5468	67.4411	70.2598	1.10335	0.00677788	0.169202	up
ENSGALG00000007596	-	387	630	539	464	477	449	0.292162	1.03781	0.40629	0.440777	0.361574	0.63226	1.12533	0.000278835	0.0250321	up
ENSGALG00000008166	TLR15	197	147	127	105	60	59	0.735022	0.574149	0.487882	0.413835	0.232532	0.199666	1.05596	0.00120229	0.0610063	up
ENSGALG00000008309	-	21	37	17	8	7	19	0.195181	0.613737	0.130821	0.061757	0.051065	0.421782	1.90433	0.00290616	0.102817	up
ENSGALG00000008427	GNAT3	345	79	298	45	44	19	1.44851	0.405475	1.25173	0.188262	0.185211	0.08005	2.70934	1.12231e-07	5.82135e-05	up
ENSGALG00000008741	PROKR2	6	20	3	0	2	3	0.031162	0.104013	0.010527	0	0.006284	0.010774	1.07748	0.0340571	0.400465	up
ENSGALG00000008802	TECTB	86	59	181	56	39	38	0.779223	0.874838	1.67502	0.537591	0.476886	0.434577	1.04001	0.00563621	0.149072	up
ENSGALG00000009034	ALK	37	81	104	37	40	30	0.109715	0.248203	0.316847	0.113338	0.120415	0.097387	1.2434	0.00314586	0.107785	up
ENSGALG00000009129	DLX5	188	151	235	82	92	79	1.45045	1.17393	1.80511	0.641679	0.71018	0.622842	1.24138	1.24453e-05	0.00221325	up
ENSGALG00000009479	-	57	243	33	46	69	33	0.132155	0.575041	0.075471	0.109696	0.160755	0.077265	1.35023	0.0241843	0.336257	up
ENSGALG00000009573	ANXA10	8	6	37	0	4	0	0.079016	0.061794	0.467689	0	0.033873	0	1.84274	0.0326459	0.392824	up
ENSGALG00000009830	MGAT4D	90	82	64	42	28	21	0.41766	0.383276	0.294868	0.194988	0.128766	0.09618	1.28526	0.00675985	0.168978	up
ENSGALG00000009902	CFAP57	27	60	63	31	7	15	0.129398	0.308696	0.726452	0.150107	0.01856	0.062067	1.09978	0.00376934	0.119143	up
ENSGALG00000010044	KCNMB4	44	57	41	17	9	7	0.450344	0.57816	0.411136	0.16749	0.090145	0.069833	2.35584	6.90588e-05	0.0086546	up
ENSGALG00000010657	-	573	653	585	267	253	88	1.4845	1.70409	1.51113	0.70285	0.65406	0.242091	1.04601	0.000395617	0.0310393	up
ENSGALG00000010980	STK31	1733	1394	1176	416	366	239	2.61181	3.04662	2.08349	0.892913	0.716761	0.354234	2.00593	1.8206e-11	2.26641e-08	up
ENSGALG00000011202	COLQ	37	19	43	19	14	9	0.504088	0.232064	0.537223	0.224264	0.280029	0.107161	1.58232	0.0185703	0.290179	up
ENSGALG00000011287	SULT	23	15	28	2	11	6	0.143287	0.089997	0.171537	0.012403	0.06393	0.038206	1.84228	0.0411527	0.43464	up
ENSGALG00000011391	AMN	20	55	35	19	12	9	0.13886	0.397186	0.247532	0.137646	0.080825	0.065668	1.4153	0.0210681	0.31322	up
ENSGALG00000011809	GRIN2B	17	25	19	5	5	0	0.031127	0.044581	0.033121	0.007504	0.008831	0	3.04138	0.00386815	0.120677	up
ENSGALG00000012783	MYBPC1	351	287	514	92	297	108	0.922113	0.977551	1.40809	0.215161	0.692861	0.249041	1.17908	0.000617804	0.0407641	up
ENSGALG00000013007	-	73	122	125	106	56	61	0.355051	0.996913	0.736622	0.563294	0.363133	0.309549	1.50308	0.00432501	0.128766	up
ENSGALG00000013081	VWC2	154	87	139	64	57	48	1.01431	0.54576	0.919944	0.404894	0.357525	0.313538	1.03586	0.00319932	0.108423	up
ENSGALG00000013281	RSPH6A	30	37	6	5	4	6	0.157644	0.19328	0.029684	0.021499	0.019649	0.027	2.77524	0.00511593	0.141946	up
ENSGALG00000013598	SCGN	156	191	412	136	160	128	1.06629	1.45439	2.86869	0.899747	0.95244	1.00661	1.06164	0.00237341	0.0915674	up
ENSGALG00000013659	NOX3	227	295	169	18	34	31	0.725013	1.18629	0.612585	0.062802	0.11269	0.098076	3.08284	4.02176e-10	3.95254e-07	up
ENSGALG00000014164	BIK	124	113	116	54	64	54	1.24124	1.11691	1.1449	0.47629	0.489532	0.556307	1.14613	5.61977e-05	0.00744241	up
ENSGALG00000015015	CYTL1	345	276	225	225	128	40	3.37051	2.70907	2.18826	2.228	1.24838	0.391194	1.0988	0.018504	0.289871	up
ENSGALG00000015080	SLC24A2	125	155	92	55	61	47	0.692103	0.787502	0.453954	0.281942	0.338056	0.239456	1.41522	5.71324e-05	0.00744614	up
ENSGALG00000015737	NCAM2	42	120	55	35	28	40	0.110103	0.317634	0.142505	0.336335	0.07172	0.107519	1.09551	0.0335191	0.396391	up
ENSGALG00000016287	NR0B1	69	61	63	48	4	37	0.67693	0.59678	0.611599	0.473042	0.030192	0.362533	1.03684	0.0262387	0.351294	up
ENSGALG00000016483	-	144	40	98	43	37	41	0.496623	0.138385	0.335012	0.149475	0.127022	0.144533	1.19675	0.00519913	0.143827	up
ENSGALG00000016499	-	156	88	37	35	46	24	0.933637	0.531347	0.248618	0.198076	0.296215	0.171027	1.27595	0.0317889	0.390285	up
ENSGALG00000016884	SLC15A1	1826	1369	644	833	422	352	5.30176	3.76628	1.47852	2.03614	1.11558	1.00091	1.23436	0.0109436	0.220997	up
ENSGALG00000017237	TYR	0	9	0	0	2	0	0	0.046456	0	0	0.006319	0	4.00674	0.0169498	0.276904	up
ENSGALG00000017411	-	253	218	189	105	85	66	2.10232	1.81989	1.55991	0.884249	0.702973	0.556964	1.37543	3.59205e-07	0.000134149	up
ENSGALG00000019240	-	24	33	21	9	9	4	0.333683	0.482672	0.184808	0.123788	0.103671	0.054802	2.48192	0.000254574	0.0238878	up
ENSGALG00000020703	GRB14	27	35	28	12	16	20	0.136953	0.414937	0.146383	0.30066	0.10309	0.102289	1.5253	0.0241671	0.336257	up
ENSGALG00000020788	-	808	1143	1379	227	285	372	1.40782	1.88423	2.26743	0.395625	0.478729	0.639833	1.81788	6.01888e-19	2.24781e-15	up
ENSGALG00000025772	ELOVL3	49	46	28	4	3	26	0.330177	0.312184	0.18552	0.027065	0.013683	0.175117	2.08716	0.0146399	0.257411	up
ENSGALG00000025906	-	113	15	98	48	28	53	1.74395	0.220012	1.50122	0.749374	0.428721	0.830851	1.11515	0.00276758	0.100348	up
ENSGALG00000026161	-	39	43	20	7	15	13	0.258661	0.290197	0.131939	0.041266	0.100397	0.083968	1.69266	0.0167195	0.276843	up
ENSGALG00000026594	HS3ST5	5	5	0	0	0	0	0.019829	0.019964	0	0	0	0	4.84028	0.0257397	NA	up
ENSGALG00000026991	-	27	34	30	11	24	13	0.174061	0.220237	0.192262	0.066721	0.154684	0.080439	1.22601	0.0427553	0.443292	up
ENSGALG00000027103	TSPAN19	9	8	10	0	0	1	0.041121	0.048646	0.046486	0	0	0.001303	4.57743	0.00944531	0.204749	up
ENSGALG00000028360	MGAT4C	13	7	24	1	0	1	0.121256	0.294643	0.195348	0.001559	0	0.001029	3.54898	0.0136137	0.247766	up
ENSGALG00000029509	NECAB1	224	84	210	94	70	41	1.6286	0.575859	1.83406	0.704778	0.525497	0.535441	1.30388	0.00138791	0.065945	up
ENSGALG00000032022	CDH10	158	160	126	65	62	35	0.52011	0.529847	0.411181	0.215815	0.203262	0.115921	1.46493	2.84019e-05	0.00449448	up
ENSGALG00000032039	HOXD13	16	21	0	5	3	3	0.088618	0.115134	0	0.023142	0.011427	0.011664	2.00709	0.0340053	0.400114	up
ENSGALG00000032066	-	4	96	138	2	33	36	0.02866	1.01467	1.06215	0.013613	0.426058	0.530562	1.51282	9.01504e-06	0.00173544	up
ENSGALG00000032402	VSTM2B	194	203	81	52	46	56	1.1194	1.16762	0.449964	0.392415	0.353368	0.446262	1.42109	0.0191338	0.295541	up
ENSGALG00000033183	GABRQ	5	17	20	0	0	3	0.025554	0.104924	0.120476	0	0	0.016821	3.43291	0.00819684	0.186966	up
ENSGALG00000033203	TRIM54	54	31	58	27	26	19	0.2073	0.119995	0.218572	0.105172	0.099663	0.072251	1.0261	0.0231215	0.328816	up
ENSGALG00000033247	-	5	4	3	0	0	0	0.038716	0.032465	0.018281	0	0	0	5.88343	0.000723201	0.0456228	up
ENSGALG00000033827	-	94	132	91	48	50	51	0.539373	0.761185	0.518332	0.277344	0.288412	0.296466	1.05052	0.0316716	0.389926	up
ENSGALG00000034212	CFAP65	45	55	81	0	0	0	0.085381	0.105851	0.15511	0	0	0	8.4616	6.53588e-11	7.17908e-08	up
ENSGALG00000034265	ZAR1	37	39	14	6	7	14	0.242156	0.259656	0.089404	0.038467	0.046376	0.091851	1.5272	0.00402272	0.123438	up
ENSGALG00000034438	GNB3	83	25	82	31	24	28	0.593195	0.267215	0.562464	0.28626	0.1577	0.406671	1.34923	0.000771764	0.0480371	up
ENSGALG00000035569	MC2R	82	123	115	13	19	3	0.526658	0.756761	0.757875	0.075174	0.111791	0.012637	3.00972	3.80731e-09	2.73438e-06	up
ENSGALG00000035679	LMO1	83	130	117	51	58	70	1.12248	1.47425	1.36387	0.594803	0.715043	0.845731	1.06423	0.00489575	0.138457	up
ENSGALG00000035950	NGFR	46	75	208	43	48	33	0.370116	0.617042	1.70592	0.348586	0.399047	0.269433	1.5519	0.0035845	0.116198	up
ENSGALG00000036418	ANXA13	34	39	82	22	4	23	0.263808	0.313738	0.666646	0.168608	0.025584	0.183728	1.15037	0.00748604	0.178911	up
ENSGALG00000037285	KCNK9	11	9	14	0	3	0	0.068237	0.054962	0.094545	0	0.013683	0	4.9185	0.00356273	0.115901	up
ENSGALG00000037286	VIL1	336	90	240	802	145	962	0.770216	0.71299	0.523414	1.75115	0.408226	2.15845	1.17679	0.00233766	0.0913205	up
ENSGALG00000037408	ADMP	10	40	0	0	0	0	0.074213	0.311342	0	0	0	0	3.78584	0.016299	0.272715	up
ENSGALG00000038084	GNAT2	0	0	7	0	0	0	0	0	0.041922	0	0	0	3.03182	0.00962647	0.207091	up
ENSGALG00000038714	NDUFB7	296	178	310	122	271	132	5.94765	3.5246	6.16859	2.43335	5.59004	2.89582	1.14913	0.00632504	0.162013	up
ENSGALG00000038799	-	42	33	64	13	73	41	0.345044	0.276816	0.531661	0.106642	0.614991	0.347877	1.36694	0.0072859	0.177148	up
ENSGALG00000039116	-	14	15	15	4	27	1	0.289278	0.303301	0.30755	0.082794	0.568462	0.004706	1.8656	0.0297699	0.375351	up
ENSGALG00000039587	SYNDIG1	23	29	21	0	14	3	0.320638	0.247639	0.153585	0	0.107796	0.015246	1.97629	0.0260212	0.349573	up
ENSGALG00000039772	RGS7	22	49	47	5	8	6	0.11039	0.254259	0.621304	0.022298	0.030084	0.026358	2.46845	3.7443e-05	0.00537825	up
ENSGALG00000040114	PTPRZ1	1354	1541	1117	578	286	718	2.61201	3.2136	2.30706	1.33862	0.603727	1.66342	1.36533	1.75398e-06	0.000463917	up
ENSGALG00000041273	KIAA0319	141	241	180	75	59	95	0.268831	0.452698	0.334633	0.141146	0.110081	0.179254	1.09871	0.000333985	0.0279664	up
ENSGALG00000041371	-	15	0	0	2	0	0	0.223658	0	0	0.004221	0	0	3.72921	0.0269421	0.355072	up
ENSGALG00000041744	OTOS	525	1151	490	336	419	537	1.59699	2.81865	1.78236	1.46073	1.03586	1.87013	1.04705	3.24886e-05	0.00481476	up
ENSGALG00000042454	DCDC2	95	47	61	25	21	31	0.579436	0.28751	0.372669	0.15567	0.320564	0.188293	1.50027	0.000949226	0.0533706	up
ENSGALG00000042936	SYCE3	95	72	76	27	29	32	1.0396	0.813411	1.0354	0.22663	0.388271	0.43629	1.07391	0.00208491	0.0864799	up
ENSGALG00000043026	-	309	223	345	334	380	352	1.15273	0.864719	0.709988	1.07124	0.733174	0.8024	1.64237	0.00174885	0.0779388	up
ENSGALG00000043435	CARNS1	8	4	26	7	10	3	0.028791	0.014616	0.101694	0.026936	0.037633	0.009085	1.80479	0.0394237	0.425386	up
ENSGALG00000043556	-	1422	1378	2732	1046	488	660	1.68863	2.41548	2.7818	1.29734	0.482567	1.00634	1.16497	0.0121281	0.233472	up
ENSGALG00000044238	-	111	130	118	15	40	27	0.855808	1.01405	0.907586	0.118111	0.306625	0.211588	1.94898	8.47738e-05	0.0100827	up
ENSGALG00000044375	HDDC3	0	7	0	1	0	0	0	0.128548	0	8.8e-05	0	0	2.83871	0.0358635	0.41135	up
ENSGALG00000044439	-	25	19	9	9	2	5	0.425823	0.330153	0.128708	0.165307	0.026911	0.076507	3.78968	0.0226129	0.325058	up
ENSGALG00000044478	-	6	8	27	7	0	1	0.011076	0.016723	0.058263	0.014251	0	0.00169	2.13356	0.0474025	0.464789	up
ENSGALG00000044727	ANKRD34B	81	75	147	22	14	27	0.581162	0.536866	1.05011	0.157329	0.094755	0.191479	2.43887	1.38494e-09	1.12439e-06	up
ENSGALG00000044780	-	21	8	14	0	3	7	0.102941	0.039343	0.067452	0	0.011091	0.034797	2.74141	0.0395639	0.425386	up
ENSGALG00000044818	-	62	36	30	19	13	10	0.605629	0.356525	0.289931	0.184535	0.124309	0.099485	2.52428	0.0012225	0.0613647	up
ENSGALG00000045984	-	20	8	18	0	0	4	0.165768	0.061634	0.147488	0	0	0.034815	4.17765	0.00836006	0.188992	up
ENSGALG00000046188	CDC20B	45	9	3	0	4	3	0.362508	0.060179	0.019547	0	0.026398	0.016728	2.89888	0.0240949	0.335959	up
ENSGALG00000046360	-	1520	2214	1894	1269	1531	769	2.21936	2.25779	2.19382	1.60227	1.83077	1.23297	1.12363	2.33696e-06	0.000597781	up
ENSGALG00000046789	-	16	2	2	9	41	26	0.108768	0.01093	0.011278	0.062135	0.286657	0.181717	1.94789	1.4996e-12	2.33351e-09	up
ENSGALG00000046824	-	65	226	5	2	0	3	0.457936	1.61889	0.02851	0.007348	0	0.019718	5.28898	3.30064e-14	7.70411e-11	up
ENSGALG00000046958	-	156	595	270	62	125	92	1.17571	4.52904	2.02892	0.469294	0.942201	0.702526	1.90077	3.22073e-05	0.00481125	up
ENSGALG00000047025	-	50	17	47	12	4	8	0.66457	0.205541	0.564137	0.132274	0.021886	0.063863	6.71223	4.26171e-05	0.00589473	up
ENSGALG00000047199	-	130	313	53	32	57	25	0.75229	1.8066	0.305214	0.183376	0.329969	0.143861	1.42335	0.00149943	0.069997	up
ENSGALG00000047648	-	22	64	70	2	3	6	0.116684	0.347763	0.422105	0.010398	0.014811	0.031957	1.54317	0.00926066	0.202443	up
ENSGALG00000048022	-	3	1	2	0	1	0	0.020891	0.003996	0.014989	0	0.000304	0	1.84423	0.0322419	0.392791	up
ENSGALG00000048222	-	43	95	54	14	29	17	0.405906	0.900289	0.506243	0.129823	0.276093	0.155558	1.75114	0.0164298	0.273934	up
ENSGALG00000048562	-	28	40	27	2	17	4	0.380336	0.320167	0.16891	0.045436	0.383941	0.062454	2.41296	0.00431592	0.12874	up
ENSGALG00000048665	-	36	26	34	20	53	45	0.120085	0.085649	0.112397	0.067762	0.180324	0.153252	1.61512	0.0370393	0.414235	up
ENSGALG00000048981	-	233	0	155	15	29	54	1.7609	0	1.16389	0.112103	0.216017	0.408981	1.45713	0.00412978	0.125549	up
ENSGALG00000049024	CD7	62	30	137	20	24	8	0.358602	0.201219	0.531751	0.068836	0.099726	0.02849	2.2903	0.00175581	0.0780623	up
ENSGALG00000049208	-	114	120	119	25	17	5	1.24592	1.31219	1.80894	0.314179	0.174845	0.052052	2.40626	0.0145921	0.257298	up
ENSGALG00000049474	-	3	7	3	11	3	8	0.007347	0.02219	0.007321	0.037293	0.007366	0.028925	2.72251	0.0208683	0.310993	up
ENSGALG00000049491	-	9	12	32	3	0	2	0.110888	0.134563	0.431414	0.022986	0	0.021476	2.9025	0.0264159	0.352095	up
ENSGALG00000050186	-	487	303	427	305	320	383	1.65038	1.03333	1.44217	1.0498	1.08628	1.32567	5.05307	0.000274927	0.0249576	up
ENSGALG00000050229	-	165	100	135	55	150	58	1.63487	0.956269	1.28775	0.443941	1.44716	0.553081	1.23398	0.0191667	0.295541	up
ENSGALG00000050250	-	1982	1119	2137	1308	2033	1369	70.7704	40.2383	76.0249	47.4046	72.7914	49.8706	1.84859	0.00291276	0.102817	up
ENSGALG00000050356	-	59	24	45	18	31	10	0.457072	0.183361	0.345691	0.137561	0.234021	0.072294	1.35711	0.0281595	0.365154	up
ENSGALG00000050520	-	65	106	66	24	19	38	0.288779	0.475535	0.29466	0.10817	0.084092	0.174201	1.20257	0.00195626	0.0824589	up
ENSGALG00000050597	-	5	1	2	45	1	5	0.035991	0.006684	0.013756	0.340407	0.004808	0.037778	2.55486	0.00349573	0.114965	up
ENSGALG00000050834	-	59	151	110	6	64	12	0.442786	1.14921	0.82441	0.03915	0.484667	0.092061	2.32318	0.00188079	0.0807354	up
ENSGALG00000050905	-	0	3	17	0	0	0	0	0.008114	0.064061	0	0	0	5.35122	0.0111603	NA	up
ENSGALG00000051229	-	907	930	834	381	485	393	0.64869	0.497249	0.385676	0.184942	0.254672	0.225138	1.09314	0.012534	0.236542	up
ENSGALG00000051302	-	4	8	20	2	1	0	0.070867	0.164605	0.427567	0.022201	0.020756	0	5.12375	0.00241479	0.0927217	up
ENSGALG00000051502	-	170	7	103	10	28	6	0.883226	0.050456	0.867264	0.086683	0.506447	0.030797	1.55307	0.00333077	0.111462	up
ENSGALG00000051508	-	98	134	136	58	37	52	0.57156	0.786483	0.789885	0.342992	0.214967	0.306232	1.37316	0.000362797	0.0293269	up
ENSGALG00000051859	-	0	0	0	0	2	0	0	0	0	0	0.016301	0	4.05551	0.00132365	0.0640325	up
ENSGALG00000052108	-	23	26	10	32	8	7	0.085333	0.098495	0.034688	0.119925	0.026682	0.023246	2.7416	8.22268e-07	0.000260241	up
ENSGALG00000052157	-	9	6	9	3	0	2	0.077482	0.044575	0.076237	0.018035	0	0.00903	6.14781	2.3194e-13	4.81225e-10	up
ENSGALG00000052304	-	7	2	0	0	0	0	0.06069	0.016936	0	0	0	0	5.53481	0.00475277	NA	up
ENSGALG00000052374	-	23	41	29	0	7	3	0.129737	0.312641	0.158348	0	0.034128	0.011599	4.6544	4.91289e-05	0.00664771	up
ENSGALG00000052387	-	47	21	51	3	6	0	0.17142	0.076839	0.183245	0.007459	0.01839	0	4.39241	4.02238e-05	0.00560522	up
ENSGALG00000052583	-	8	20	5	3	5	0	0.239106	0.263855	0.058413	0.072901	0.139409	0	1.35344	0.0346754	0.404242	up
ENSGALG00000052645	-	426	364	596	337	174	185	2.53744	2.18396	3.53804	2.03948	1.03467	1.12335	1.14924	2.55861e-05	0.00415452	up
ENSGALG00000052686	-	28	1	12	3	1	2	0.300416	0.002971	0.114357	0.02323	0.000991	0.012602	2.41694	0.0288681	0.369468	up
ENSGALG00000052737	-	1328	617	745	683	751	533	5.61802	2.66943	3.02473	2.8351	3.14027	2.24694	1.14078	0.00102051	0.0549162	up
ENSGALG00000052741	-	6	2	9	0	0	0	0.051441	0.019481	0.087803	0	0	0	4.82905	0.0346849	NA	up
ENSGALG00000052760	ATOH7	1	36	42	16	26	13	0.000813	0.182779	0.206667	0.077304	0.130246	0.065369	1.17434	0.028848	0.369465	up
ENSGALG00000052766	-	12	14	22	6	3	5	0.080411	0.090857	0.146591	0.036822	0.017886	0.034512	2.68425	0.000152765	0.0163942	up
ENSGALG00000052894	-	109	129	65	35	44	76	0.476969	0.569291	0.279632	0.155715	0.193124	0.337973	1.15148	2.43365e-07	0.000108199	up
ENSGALG00000052931	-	32	9	7	5	0	2	0.115582	0.029969	0.022284	0.015135	0	0.007552	3.16516	0.0020726	0.0861954	up
ENSGALG00000053121	CCAH221	34	87	58	32	19	14	0.541549	1.40017	0.475254	0.266068	0.153865	0.112943	1.21815	0.0132372	0.244731	up
ENSGALG00000053164	-	578	992	692	8	295	208	3.07936	5.32004	3.67221	0.040466	1.57312	1.12812	1.53616	4.38221e-11	5.11431e-08	up
ENSGALG00000053262	HIST2H4B	1149	628	1148	658	1199	591	41.0086	22.5571	40.8547	23.8344	42.9245	21.4983	1.05221	0.0211322	0.313676	up
ENSGALG00000053680	HIST1H46L2	262	148	316	124	195	119	9.32584	5.31212	11.2169	4.49316	6.97291	4.30262	1.05633	1.06665e-05	0.00199176	up
ENSGALG00000053716	-	2	5	17	6	2	0	0.023911	0.062337	0.231156	0.073107	0.018015	0	1.34673	0.000888862	0.0515457	up
ENSGALG00000054158	-	2	5	7	0	0	0	0.011708	0.053434	0.074517	0	0	0	4.93441	0.0276102	NA	up
ENSGALG00000054210	-	5	8	9	2	3	5	0.071267	0.132484	0.148177	0.035117	0.052078	0.076579	1.09292	0.0193362	0.297561	up
ENSGALG00000054371	-	86	87	81	36	41	55	0.30253	0.308916	0.283434	0.129034	0.144176	0.198457	1.08315	0.00703431	0.173516	up
ENSGALG00000054387	-	6	6	2	3	6	6	0.052039	0.044384	0.016386	0.026626	0.047596	0.053561	1.03	0.0204774	0.308118	up
ENSGALG00000054474	-	232	192	455	154	46	82	0.647766	0.426621	1.11614	0.479338	0.082449	0.249047	1.52832	1.33894e-05	0.00233664	up
ENSGALG00000054486	MC1R	3	0	8	0	6	0	0.016341	0	0.058231	0	0.048387	0	3.20654	0.0219802	0.319779	up
ENSGALG00000054636	-	11	7	9	0	0	0	0.073624	0.042197	0.055873	0	0	0	3.68345	0.0212778	0.314336	up
ENSGALG00000054659	-	46	31	63	30	36	35	0.476208	0.339413	0.810657	0.312205	0.463503	0.366285	4.84007	0.0270827	NA	up
ENSGALG00000055048	-	0	1	1	1	0	1	0	0.000896	0.000296	0.000301	0	0.023797	1.01999	0.0442163	0.449882	up
Gallus_gallus_newGene_3837		276	213	403	37	60	90	0.631095	0.489521	0.918988	0.085836	0.13656	0.209945	1.2628	1.77908e-06	0.0001085	up
Gallus_gallus_newGene_9544		1085	1076	912	438	291	289	0.782738	1.09175	0.837348	0.333227	0.729719	0.186373	1.27637	1.56966e-10	6.8e-08	up
Gallus_gallus_newGene_15125		349	369	683	113	143	101	0.555067	0.512799	0.917708	0.139953	0.300271	0.180204	1.32023	7.32619e-08	8.1e-06	up
Gallus_gallus_newGene_22845		2020	1874	1544	0	0	0	0.623663	0.582489	0.474907	0	0	0	6.10654	1.025e-177	3.59e-171	up
Gallus_gallus_newGene_28583		361	275	364	135	38	75	2.01655	1.30799	1.79583	0.678811	0.158916	0.253846	1.02642	0.000127297	0.00606461	up
Gallus_gallus_newGene_31217		164	298	153	17	50	49	1.51536	2.51632	1.49406	0.427591	0.623942	0.756098	1.09999	5.08506e-05	0.00211858	up
Gallus_gallus_newGene_31648		135	115	149	44	45	29	0.689167	0.592519	0.761675	0.227094	0.227751	0.151053	1.15081	1.68818e-06	0.000311804	up
Gallus_gallus_newGene_36749		157	208	119	30	30	52	1.08579	1.12072	0.981613	0.258021	0.121709	0.219438	1.17235	7.21112e-06	0.000587242	up
Gallus_gallus_newGene_38987		774	704	434	206	216	196	2.43446	2.4118	1.82712	0.782149	1.30839	1.12241	1.22641	2.71648e-08	5.62e-06	up
Gallus_gallus_newGene_66561		127	113	80	0	0	0	0.437678	0.393523	0.275206	0	0	0	2.03075	1.28127e-12	4.39e-13	up
Gallus_gallus_newGene_70428		226	308	205	0	5	14	0.648326	0.888594	0.58501	0	0.011589	0.040714	1.29826	2.1401e-05	1.96e-05	up
Gallus_gallus_newGene_73732		915	934	1583	489	339	367	0.806916	1.07712	1.39012	0.651278	0.754361	0.372552	1.11902	6.21643e-07	9.08e-05	up
Gallus_gallus_newGene_78566		1366	1593	865	0	0	0	1.60397	2.05356	1.01163	0	0	0	4.72151	2.03846e-70	8.81e-84	up
Gallus_gallus_newGene_83465		210	455	167	40	60	68	0.299286	0.654419	0.237269	0.057146	0.085281	0.098343	1.15061	1.95762e-05	0.00105211	up
Gallus_gallus_newGene_90396		171	149	230	45	30	22	0.437947	0.338717	0.596527	0.102938	0.066812	0.050951	1.46571	1.23332e-08	1.41e-06	up
Gallus_gallus_newGene_91790		67	71	125	10	4	9	0.627671	0.664905	1.1602	0.082746	0.027691	0.079196	1.33829	5.91582e-07	2.77e-05	up
ENSGALG00000000806	LINGO3	49	32	47	91	159	207	0.295123	0.197263	0.283001	0.565832	0.973534	1.29155	-1.91853	6.44798e-07	0.000211837	down
ENSGALG00000001149	ADGRG5	9	10	13	31	15	31	0.031727	0.037817	0.047213	0.123576	0.060507	0.297783	-1.56824	0.0420673	0.438682	down
ENSGALG00000001171	SEMA6B	58	57	75	167	169	137	0.140807	0.158313	0.189287	0.422717	0.483921	0.34318	-1.26207	2.04567e-05	0.00344133	down
ENSGALG00000001311	ARHGAP44	5	24	25	115	259	127	0.013333	0.087094	0.107687	0.455937	0.994278	0.465424	-3.54326	5.22793e-10	4.88106e-07	down
ENSGALG00000001391	PLLP	6	5	8	9	5	10	0.069095	0.04711	0.092324	0.102932	0.056522	0.115499	-1.76095	0.00294818	0.10387	down
ENSGALG00000001645	KCNT1	86	161	70	104	316	419	0.151458	0.280422	0.115766	0.194047	0.70802	0.746986	-1.82345	0.000186108	0.0188869	down
ENSGALG00000002312	TMEM132E	19	10	20	56	49	60	0.065602	0.035315	0.067315	0.19686	0.172935	0.213277	-1.15399	0.00837924	0.189197	down
ENSGALG00000002708	LINGO1	93	194	103	92	193	689	0.432726	0.908105	0.422008	0.430506	0.899108	3.27106	-1.12685	0.00453622	0.132406	down
ENSGALG00000002744	PCDH15	70	103	88	84	132	515	0.133967	0.200686	0.165741	0.16566	0.219281	1.09703	-1.15215	0.0135924	0.247766	down
ENSGALG00000003126	ERBB4	19	18	20	41	38	62	0.048577	0.045729	0.052479	0.108291	0.098678	0.16666	-1.29488	0.0101818	0.213701	down
ENSGALG00000003426	RHBDL3	9	16	13	18	13	70	0.1444	0.19254	0.193228	0.144631	0.102098	0.624896	-1.78682	0.022983	0.327652	down
ENSGALG00000004146	RIMS4	32	70	51	212	130	145	0.068855	0.197734	0.088152	0.593007	0.431751	0.502625	-1.44388	0.037532	0.415187	down
ENSGALG00000004365	-	24	26	22	50	78	49	0.090102	0.170725	0.454239	0.18915	0.293289	0.184232	-1.50516	0.00183796	0.0794449	down
ENSGALG00000004742	BMP15	0	0	0	8	14	0	0	0	0	0.048888	0.081024	0	-5.38522	0.00757579	NA	down
ENSGALG00000004758	KCNB1	134	181	196	287	439	478	0.557223	0.722612	0.781609	1.21436	1.81691	2.03629	-1.18002	2.46482e-06	0.000621967	down
ENSGALG00000004804	-	138	111	53	276	314	229	0.738922	0.594603	0.29758	1.49925	1.68697	1.24801	-1.16804	3.20572e-06	0.000730005	down
ENSGALG00000004860	RASD1	19	7	22	21	25	207	0.118363	0.039503	0.142896	0.138772	0.15779	1.37431	-2.88677	0.000908581	0.0517254	down
ENSGALG00000004903	CHST8	41	10	35	65	19	62	0.209641	0.123197	0.307779	0.550087	0.103379	0.609519	-1.95529	0.00126616	0.0620553	down
ENSGALG00000005062	FOXN4	2	0	0	3	11	0	0.008647	0	0	0.009144	0.045062	0	-4.82217	0.0188783	0.293029	down
ENSGALG00000005140	RRAD	19	87	24	79	63	191	0.057344	0.274965	0.074994	0.252476	0.197363	0.615705	-1.40838	0.0305738	0.381621	down
ENSGALG00000005226	MYOZ1	23	28	21	72	14	74	0.310697	0.212548	0.153739	0.689116	0.107555	0.575812	-1.17196	0.0181699	0.285835	down
ENSGALG00000005258	SSTR5	0	0	7	3	32	39	0	0	0.030106	0.01222	0.156409	0.198649	-3.88813	0.00538098	0.145689	down
ENSGALG00000005502	KCNG4	4	0	7	10	13	6	0.012676	0	0.025264	0.041782	0.238841	0.024451	-2.09081	0.0406693	0.430997	down
ENSGALG00000005524	NTSR1	15	15	8	42	20	42	0.118148	0.111908	0.055378	0.333108	0.150827	0.332612	-1.54011	0.0139747	0.251881	down
ENSGALG00000005853	HTR2C	72	90	97	269	320	268	0.230764	0.291389	0.690285	0.816526	1.23313	1.13084	-1.34762	1.18576e-05	0.00214968	down
ENSGALG00000006221	KIF1A	163	124	158	221	364	345	0.232456	0.178521	0.242524	0.320722	0.521517	0.914095	-1.08789	5.40126e-05	0.00720412	down
ENSGALG00000006676	RLBP1	0	0	0	0	8	5	0	0	0	0	0.052257	0.027672	-1.55361	0.000624776	0.041079	down
ENSGALG00000007419	MASP1	10	21	15	4	43	140	0.029417	0.062393	0.043412	0.012086	0.1309	0.440122	-2.17042	0.0148198	0.25876	down
ENSGALG00000007426	MKX	5	3	3	15	9	12	0.030781	0.01437	0.014223	0.104571	0.058798	0.08568	-2.14833	0.0487819	0.471275	down
ENSGALG00000007546	-	13	16	5	23	33	40	0.050107	0.06	0.015856	0.0916	0.347168	0.211893	-1.58951	0.0386638	0.421218	down
ENSGALG00000007993	DCX	438	179	329	211	1442	1593	0.481804	0.228264	0.611755	0.486304	1.23477	1.63671	-1.50735	8.33591e-05	0.00997797	down
ENSGALG00000008087	CPA1	139	117	28	294	144	459	1.12171	0.952948	0.222734	2.42033	1.16645	3.79997	-1.62352	0.000686888	0.0442285	down
ENSGALG00000008417	CFAP58	114	104	65	193	192	330	0.275992	0.252752	0.156049	0.473113	0.466579	0.815179	-1.30716	2.4686e-05	0.00407931	down
ENSGALG00000008424	CALML3	83	86	48	116	151	204	1.10446	1.14694	0.635982	1.55926	2.01252	2.76636	-1.19578	0.0014806	0.0694653	down
ENSGALG00000008516	CPO	7	24	0	31	33	50	0.045265	0.176072	0	0.235052	0.244061	0.379775	-2.35472	0.000957713	0.0533832	down
ENSGALG00000009231	PNLIP	0	0	0	0	2	0	0	0	0	0	0.013214	0	-2.40196	0.0203884	0.307733	down
ENSGALG00000009446	LSMEM1	13	27	20	27	91	87	0.134127	0.280085	0.203084	0.283281	0.942136	0.909793	-1.74696	0.000269953	0.0249546	down
ENSGALG00000009844	ACTC1	38	8	30	29	59	628	0.225156	0.043383	0.191115	0.176417	0.474458	4.84228	-3.46443	0.0121701	0.23348	down
ENSGALG00000009963	LYZ	41	11	75	132	282	52	0.768803	0.202547	1.42351	2.54847	5.38485	1.00445	-1.03648	0.00504297	0.140758	down
ENSGALG00000010881	ASB2	32	29	14	19	57	303	0.135001	0.124869	0.059715	0.08282	0.252835	1.37924	-2.43742	0.00146414	0.0690403	down
ENSGALG00000011190	PLAC8	52	32	9	99	102	47	0.678879	0.42494	0.108032	1.34595	1.34621	0.635211	-1.35869	0.0138256	0.250402	down
ENSGALG00000011594	NR1H4	37	36	21	117	56	53	0.272957	0.217937	0.154222	0.890174	0.399269	0.392996	-1.12243	0.0178877	0.283305	down
ENSGALG00000011646	PLD4	7	6	3	14	25	24	0.034083	0.026914	0.015765	0.073281	0.131586	0.125047	-1.58351	0.021926	0.319779	down
ENSGALG00000011859	GBE	13	17	8	79	94	76	0.09377	0.133352	0.041759	0.589298	0.770082	0.607041	-1.00822	0.0071555	0.175809	down
ENSGALG00000012056	GRAP2	19	15	21	61	62	33	0.06946	0.051674	0.073426	0.22441	0.226205	0.123341	-1.32045	0.0130194	0.242644	down
ENSGALG00000012106	SCTR	38	15	28	88	159	27	0.297828	0.109014	0.224163	0.714566	1.28928	0.213937	-1.69928	0.00176292	0.0781925	down
ENSGALG00000012145	TBPL2	0	0	5	32	26	6	0	0	0.039562	0.605934	0.791486	0.056544	-2.27086	0.00642978	0.164021	down
ENSGALG00000012710	NCS1	74	36	73	67	140	138	0.678786	0.354623	0.75462	0.713284	1.33827	1.32324	-1.00497	0.0197489	0.301283	down
ENSGALG00000012748	ELOVL2	0	0	0	2	0	12	0	0	0	0.020557	0	0.115491	-5.13861	0.0480419	NA	down
ENSGALG00000012830	IRF4	0	9	12	36	29	34	0	0.030361	0.038645	0.125331	0.100803	0.120335	-1.88796	0.0200611	0.304059	down
ENSGALG00000014225	KCTD8	20	16	16	37	39	50	0.098812	0.07723	0.078078	0.185963	0.195147	0.253008	-1.40202	0.00965415	0.207448	down
ENSGALG00000014750	-	14	7	0	20	41	18	0.08609	0.039916	0	0.131474	0.265362	0.114515	-2.35044	0.0228883	0.327505	down
ENSGALG00000014754	-	4	0	0	19	23	6	0.08067	0	0	0.312333	0.56997	0.039463	-2.70526	0.0463187	0.460303	down
ENSGALG00000014766	HAO2	29	31	6	76	32	60	0.262675	0.205448	0.025214	0.374989	0.164716	0.300164	-1.54833	0.00850676	0.191612	down
ENSGALG00000015018	CASQ2	42	49	25	54	8	237	0.221746	0.258049	0.127834	0.292116	0.041833	1.28618	-1.07364	0.0315386	0.389497	down
ENSGALG00000015084	IGSF11	10	9	0	19	19	44	0.049043	0.042915	0	0.1273	0.257775	0.52369	-2.46328	0.00801114	0.184828	down
ENSGALG00000015720	CHODL	25	5	9	24	27	54	0.179032	0.031567	0.059553	0.182519	0.203245	0.578503	-1.94741	0.0100076	0.211872	down
ENSGALG00000015822	-	55	28	35	82	86	77	0.304656	0.152942	0.210266	0.654808	0.48135	0.586443	-1.21894	0.000805391	0.0488565	down
ENSGALG00000016165	TFF2	235	177	284	623	413	466	3.92716	2.9873	4.73824	10.6019	6.94813	7.96643	-1.11006	1.98451e-06	0.000514677	down
ENSGALG00000016556	-	549	1298	572	5548	8696	3934	0.836726	1.99435	0.868766	8.59511	13.3048	6.12232	-2.90358	6.13047e-08	3.36689e-05	down
ENSGALG00000016669	AvBD2	1251	2016	879	4390	5492	4148	29.2834	47.3826	20.4922	104.54	128.829	98.8861	-1.77159	5.9061e-06	0.00122539	down
ENSGALG00000016761	LYG2	1142	1330	588	2148	3240	2417	9.49308	11.1321	4.86579	18.1148	26.9913	20.5054	-1.35018	0.000531187	0.0371984	down
ENSGALG00000017102	GPR12	0	0	0	6	11	0	0	0	0	0.060804	0.112587	0	-5.11257	0.0369704	NA	down
ENSGALG00000017168	SLN	13	8	27	93	95	21	0.101187	0.125815	0.420219	1.10886	1.29334	0.322049	-2.25749	0.00230524	0.0909718	down
ENSGALG00000017216	-	0	0	0	9	0	0	0	0	0	0.059633	0	0	-2.67688	0.00385756	0.120677	down
ENSGALG00000019030	-	2	0	8	87	8	15	0.015804	0	0.082559	1.01947	0.085647	0.176048	-3.92599	1.03495e-06	0.000306755	down
ENSGALG00000019060	MMP27	203	157	119	542	544	484	1.09847	0.85523	0.639956	2.98218	2.95456	2.67513	-1.74038	1.3243e-12	2.25346e-09	down
ENSGALG00000019696	CATHL2	544	888	716	1583	2370	1452	11.7332	19.2405	15.6157	35.1416	52.3214	30.2237	-1.22762	4.54153e-07	0.000160008	down
ENSGALG00000019843	AvBD4	105	153	80	247	257	203	1.74493	2.53047	1.32344	4.21293	4.14244	3.31552	-1.17011	0.00021083	0.0208298	down
ENSGALG00000020331	-	39	38	34	92	112	43	0.162911	0.157952	0.142713	0.390799	0.471338	0.18387	-1.18449	0.0103719	0.214718	down
ENSGALG00000020615	STK32C	14	7	22	26	38	64	0.034791	0.017965	0.054804	0.067597	0.096106	0.167542	-1.62136	0.0223844	0.323517	down
ENSGALG00000021451	-	519	673	164	860	1330	3759	6.16835	8.19376	1.91555	10.5561	14.6901	38.8966	-2.36038	0.00316003	0.107874	down
ENSGALG00000022815	AvBD1	860	1382	780	3161	3998	2514	19.3637	31.3767	17.4998	72.3642	100.056	66.1214	-1.69547	7.21276e-16	2.24473e-12	down
ENSGALG00000024486	-	37	29	48	118	69	65	0.152175	0.116719	0.195646	0.491642	0.281265	0.269713	-1.18859	0.00801293	0.184828	down
ENSGALG00000027323	MYH1D	174	248	105	837	792	909	0.727459	1.42405	0.620736	5.70099	7.1277	5.42804	-1.79005	4.51054e-06	0.000979363	down
ENSGALG00000028016	-	71	60	60	559	760	424	0.201454	0.172694	0.170322	1.62787	2.18755	1.24175	-2.66656	4.25518e-24	2.64856e-20	down
ENSGALG00000028374	-	6	3	5	11	30	17	0.075899	0.027957	0.066964	0.153361	0.401271	0.2261	-2.10122	0.0231827	0.328816	down
ENSGALG00000029072	NTN3	2	5	0	18	14	9	0.007321	0.015992	0	0.070261	0.052555	0.035552	-2.93128	0.0233089	0.329652	down
ENSGALG00000029569	-	155	112	96	370	30	249	1.49967	1.12026	0.936838	3.6983	0.292456	2.506	-1.27973	2.50826e-05	0.00410848	down
ENSGALG00000030929	STMN4	3	5	0	10	23	9	0.045993	0.06211	0	0.168595	0.442927	0.152011	-3.08529	0.00193683	0.0820243	down
ENSGALG00000031487	FSTL4	85	155	82	90	299	155	0.363101	0.452334	0.171345	0.190991	1.00869	0.683064	-1.09857	0.0109844	0.221025	down
ENSGALG00000031626	-	3	39	0	3	10	2	0.009269	0.133587	0	0.010045	0.368708	0.072242	-3.56437	0.000309332	0.0269914	down
ENSGALG00000031978	TARP	125	77	46	181	167	145	0.61794	0.382719	0.22292	0.930824	0.999504	0.744721	-1.08186	0.0083271	0.188581	down
ENSGALG00000032196	-	0	5	3	8	0	17	0	0.060152	0.024985	0.085759	0	0.197293	-1.65468	0.0118413	0.230565	down
ENSGALG00000032404	MYH1C	27	50	20	84	176	777	0.187416	0.560958	0.035739	1.26265	3.29548	7.65441	-1.54354	1.64378e-06	0.000444845	down
ENSGALG00000032887	CHIR-B3	15	3	0	31	11	29	0.167687	0.032396	0	0.338938	0.104602	0.333037	-1.71283	0.0188376	0.29264	down
ENSGALG00000032971	-	1	1	1	10	5	1	0.007439	0.010908	0.007022	0.111212	0.047205	0.011579	-1.74192	0.00263498	0.0974316	down
ENSGALG00000034126	EDMTF4	0	0	0	11	16	0	0	0	0	0.095228	0.209276	0	-5.18179	0.0323596	NA	down
ENSGALG00000034585	BFSP2	4	26	13	57	46	99	0.026493	0.178473	0.088737	0.39475	0.343722	0.83887	-2.38078	0.000103549	0.0120098	down
ENSGALG00000035058	CAMKV	2	4	3	16	12	39	0.031402	0.027938	0.018133	0.146315	0.106667	0.553987	-2.22759	0.00426636	0.127874	down
ENSGALG00000035673	ADAM11	0	0	2	20	3	31	0	0	0.003549	0.049863	0.010366	0.076292	-4.08583	0.0344157	NA	down
ENSGALG00000035734	IKZF4	54	42	36	65	136	102	0.373658	0.296104	0.248473	0.45547	0.949408	0.726322	-1.00537	0.0111596	0.221457	down
ENSGALG00000035762	-	78	80	59	125	204	131	0.479974	0.493401	0.357344	0.785481	1.2724	0.820605	-1.20379	0.00016695	0.0175138	down
ENSGALG00000036598	SHISAL1	246	452	226	294	523	1692	0.658859	1.22708	0.516627	0.774407	1.41184	4.816	-1.46826	0.00888813	0.197581	down
ENSGALG00000036824	CDH23	86	16	47	22	166	605	0.23153	0.041789	0.123482	0.056667	0.438873	1.739	-1.21318	0.0035032	0.114965	down
ENSGALG00000037864	MYH1A	409	642	99	185	266	1590	2.60723	4.67685	0.937561	2.35823	3.01216	13.6146	-1.04229	0.0108995	0.220506	down
ENSGALG00000037925	RND1	22	17	33	62	57	41	0.20032	0.149351	0.29922	0.578187	0.520977	0.381101	-1.18011	0.0240488	0.335623	down
ENSGALG00000039480	-	8	25	53	16	97	82	0.115905	0.398906	0.862317	0.266924	1.59438	1.36566	-2.10932	0.00256143	0.0966105	down
ENSGALG00000040866	P3H2	14	53	45	76	107	108	0.048514	0.19679	0.165416	0.282926	0.396464	0.40786	-1.00435	0.0135091	0.247169	down
ENSGALG00000040995	-	75	113	117	211	178	227	0.136433	0.149556	0.258883	0.945458	0.240409	0.329218	-1.2804	1.60878e-05	0.00273098	down
ENSGALG00000041184	NETO1	27	10	23	64	32	71	0.152298	0.0505	0.131688	0.32823	0.16457	0.377474	-1.45584	0.00801013	0.184828	down
ENSGALG00000041298	-	132	181	890	895	260	1312	0.164172	0.230427	1.06566	1.11089	0.346141	1.62363	-1.04729	0.0121657	0.23348	down
ENSGALG00000041437	FAM155B	33	41	26	66	71	77	0.270993	0.340665	0.213929	0.561297	0.600262	0.658463	-1.12825	0.00724778	0.176891	down
ENSGALG00000041978	K123	9	11	12	28	8	30	0.040785	0.0487	0.053102	0.124999	0.035613	0.137589	-1.67618	0.0458472	0.458376	down
ENSGALG00000042193	AvBD5	8	24	0	51	74	17	0.145737	0.432588	0	0.950366	1.35578	0.303112	-1.9056	0.00807911	0.18579	down
ENSGALG00000042257	MYH1F	514	402	550	488	1024	1004	2.17557	1.29642	1.07961	1.81002	2.62569	7.10385	-1.5426	6.99502e-05	0.00870787	down
ENSGALG00000042471	IL2RA	6	8	4	17	32	8	0.048795	0.072969	0.036869	0.164556	0.307182	0.075423	-2.20417	0.0115015	0.226072	down
ENSGALG00000043302	LAT2	18	31	20	111	78	42	0.126388	0.237915	0.142017	0.898703	0.823937	0.315605	-1.60688	0.000475893	0.0344433	down
ENSGALG00000043393	CADM2	400	611	309	395	721	1036	0.843859	0.853241	0.744016	0.887741	0.948553	1.3791	-1.04745	0.00793731	0.184828	down
ENSGALG00000043650	GFI1	10	9	18	56	37	22	0.075478	0.070134	0.145264	0.457893	0.294412	0.174359	-1.71481	0.0117063	0.228943	down
ENSGALG00000043654	-	637	398	685	1107	1042	781	1.5463	1.05606	1.78379	3.58629	3.28912	2.20286	-1.01369	1.20115e-07	6.06191e-05	down
ENSGALG00000043860	PGR2/3	58	57	98	194	174	184	0.992276	0.979631	1.67404	3.40064	3.01469	3.23771	-1.16568	2.9787e-05	0.00463158	down
ENSGALG00000044071	ABI3	245	102	294	145	290	116	0.63986	0.223477	0.649019	0.499162	0.701336	0.334955	-1.21872	0.0111956	0.221457	down
ENSGALG00000044138	GPA33	41	30	42	31	70	150	0.296727	0.219406	0.306247	0.228841	0.512855	1.12819	-1.18581	0.0294801	0.374398	down
ENSGALG00000044567	-	4	0	0	12	16	7	0.017098	0	0	0.051539	0.067048	0.027498	-5.17655	1.69944e-07	8.13682e-05	down
ENSGALG00000044661	-	40	34	69	211	154	150	0.402521	0.338737	0.68811	2.16303	1.56516	1.54218	-1.80023	9.80396e-07	0.000295273	down
ENSGALG00000045814	CRLF2	3	0	0	13	0	0	0.009936	0	0	0.060326	0	0	-2.04278	0.00320693	0.108484	down
ENSGALG00000046794	-	100	108	216	270	264	244	1.74665	2.32407	2.07968	2.0204	4.09483	3.25662	-1.48393	0.028615	0.367995	down
ENSGALG00000046937	-	0	0	0	5	5	18	0	0	0	0.021673	0.025363	0.091998	-5.88333	0.0011338	0.0591382	down
ENSGALG00000047118	-	0	0	2	11	21	18	0	0	0.00685	0.073657	0.139091	0.121789	-6.08082	0.000297284	0.0261051	down
ENSGALG00000047250	-	8	5	5	20	12	20	0.107996	0.089949	0.128927	0.479128	0.223729	0.367147	-1.24614	0.0326616	0.392824	down
ENSGALG00000047291	-	15	78	20	9	11	9	0.083079	0.439974	0.107651	0.049924	0.057968	0.048099	-1.50552	0.0487331	0.471255	down
ENSGALG00000047380	-	41	11	6	200	40	14	1.1423	0.046378	0.020107	1.0315	0.160698	0.149077	-3.80249	7.42725e-05	0.00907096	down
ENSGALG00000047489	-	19	0	29	13	26	14	0.100101	0	0.151321	0.066361	0.136522	0.076617	-1.26293	5.66319e-05	0.00744614	down
ENSGALG00000047543	-	152	402	110	294	463	418	0.229988	0.615768	0.166565	0.452883	0.705976	0.647598	-1.32769	0.0229206	0.327652	down
ENSGALG00000047828	-	0	0	0	9	12	2	0	0	0	0.047679	0.064507	0.006586	-4.4943	0.016841	NA	down
ENSGALG00000047837	-	29	11	17	22	3	4	0.168156	0.065478	0.100383	0.130233	0.017772	0.021973	-2.43524	0.0171339	0.278452	down
ENSGALG00000048048	-	21	24	46	150	407	310	0.022437	0.02588	0.090755	0.867053	2.48585	1.61888	-2.97728	1.121e-11	1.49517e-08	down
ENSGALG00000048560	-	4	6	4	4	8	7	0.026891	0.041914	0.025144	0.027538	0.056891	0.047951	-1.11945	0.0149832	0.260386	down
ENSGALG00000048604	-	0	5	0	3	0	4	0	0.032141	0	0.022113	0	0.029534	-3.39577	0.0470527	NA	down
ENSGALG00000048754	-	7	5	8	16	29	1	0.043107	0.032898	0.04697	0.10489	0.191369	0.005698	-1.06581	0.00820159	0.186966	down
ENSGALG00000048989	-	12	21	21	34	35	15	0.059943	0.101407	0.099884	0.166038	0.187798	0.07094	-1.91027	0.000848823	0.0504779	down
ENSGALG00000049356	-	23	0	37	74	85	44	0.109509	0	0.177535	0.363873	0.416279	0.215442	-1.24543	0.00455227	0.132406	down
ENSGALG00000049638	GATD1	543	157	417	183	186	227	0.981795	0.284859	0.75069	0.336261	0.337288	0.417929	-1.43526	0.0325336	0.392791	down
ENSGALG00000050054	-	18	26	10	61	90	60	0.091397	0.119616	0.039909	0.391205	0.686135	0.298037	-2.18367	0.00555495	0.147971	down
ENSGALG00000050131	-	84	7	24	514	384	19	0.654628	0.045362	0.154528	4.10764	4.21703	0.126858	-3.69728	0.000391545	0.0310393	down
ENSGALG00000050362	-	7	18	24	25	15	21	0.072481	0.277165	0.266142	0.296868	0.206597	0.274131	-2.23248	0.0108963	0.220506	down
ENSGALG00000051088	-	1	2	4	5	7	1	0.005315	0.013592	0.039361	0.036773	0.063508	0.002222	-5.02547	0.0447558	NA	down
ENSGALG00000051429	-	0	0	2	3	12	6	0	0	0.010202	0.017873	0.069433	0.034915	-4.22445	0.0264184	NA	down
ENSGALG00000051926	-	7	9	5	18	29	18	0.066092	0.086518	0.038451	0.168354	0.271386	0.16735	-1.94333	0.0166789	0.276839	down
ENSGALG00000052010	-	2	4	3	11	23	6	0.011297	0.081665	0.027244	0.208026	0.426145	0.065906	-2.08625	0.042024	0.438682	down
ENSGALG00000052306	-	37	40	43	50	117	52	0.108073	0.116625	0.124548	0.149586	0.343171	0.154707	-1.02597	0.0365729	0.412644	down
ENSGALG00000052484	-	7	3	0	18	34	9	0.056658	0.026367	0	0.167005	0.313061	0.076797	-2.17928	0.0494405	0.475069	down
ENSGALG00000052571	-	4	0	0	11	7	0	0.062114	0	0	0.206328	0.100759	0	-3.61756	0.0420269	NA	down
ENSGALG00000052674	-	3	0	0	13	0	7	0.009407	0	0	0.060838	0	0.028626	-4.66144	0.00790809	0.184585	down
ENSGALG00000052887	-	12	74	2	129	94	395	0.137908	1.31276	0.019552	1.62312	1.14064	4.99499	-2.21875	2.69793e-05	0.00430585	down
ENSGALG00000052939	-	20	28	9	8	38	15	0.176935	0.256524	0.076482	0.066017	0.34471	0.131219	-1.94462	0.0491945	0.474293	down
ENSGALG00000053019	-	73	69	77	50	208	101	0.574991	0.530452	0.329414	0.377058	1.65836	0.807931	-1.07539	0.0361283	0.411476	down
ENSGALG00000053318	-	20	22	6	34	184	83	0.071067	0.09551	0.021077	0.109304	0.644815	0.457857	-2.01322	3.82175e-05	0.00540633	down
ENSGALG00000053430	-	13	2	13	10	18	5	0.058208	0.005634	0.058333	0.045801	0.083154	0.02134	-4.87729	0.027691	NA	down
ENSGALG00000053549	ADAM8	18	17	13	28	40	22	0.067876	0.062945	0.04659	0.109685	0.155248	0.085142	-1.3727	0.0470193	0.46332	down
ENSGALG00000054455	-	0	4	0	4	12	14	0	0.008896	0	0.00844	0.025018	0.031545	-5.67265	0.00259241	0.0966105	down
ENSGALG00000054582	-	47	60	113	471	343	535	0.158002	0.202387	0.381166	1.62113	1.16568	1.8516	-2.99737	1.4754e-22	6.88753e-19	down
ENSGALG00000054730	-	5	3	7	15	34	17	0.026339	0.018359	0.039239	0.093905	0.222741	0.111266	-2.2795	0.0110819	0.221324	down
ENSGALG00000054732	-	3	0	0	23	11	65	0.016153	0	0	0.184875	0.080867	0.531621	-5.82759	2.99693e-05	0.00463158	down
ENSGALG00000054926	-	63	41	75	52	100	230	1.19059	0.526549	1.14411	0.914004	1.66054	4.57909	-1.37066	0.0123769	0.23511	down
ENSGALG00000054978	-	0	0	0	3	20	0	0	0	0	0.004022	0.037591	0	-5.80891	0.00318106	0.108197	down
ENSGALG00000055024	-	2	2	1	4	0	0	0.016051	0.008879	0.008554	0.034263	0	0	-1.73002	0.00559553	0.148417	down
ENSGALG00000055082	-	3	5	10	0	19	37	0.01481	0.029821	0.066411	0	0.133342	0.363258	-3.09114	0.0211827	0.313676	down
Gallus_gallus_newGene_8556		44	55	27	99	216	322	0.231374	0.239648	0.131485	0.445156	1.0793	1.69159	-1.0527	9.83721e-05	0.00431992	down
Gallus_gallus_newGene_21036		3669	5377	6366	15508	15813	14130	2.2046	1.86671	2.20148	2.6405	2.59725	3.12303	-1.32477	3.0629e-13	4.87e-10	down
Gallus_gallus_newGene_25144		424	495	273	1144	1285	933	0.198283	0.232857	0.126927	0.543358	0.602852	0.445255	-1.15003	1.41679e-07	2.34e-05	down
Gallus_gallus_newGene_25160		138	121	115	532	397	313	0.324177	0.488259	0.602705	1.42789	1.10164	0.800727	-1.30555	4.72574e-09	1.16e-06	down
Gallus_gallus_newGene_26573		32	53	19	442	489	324	0.060656	0.102539	0.035219	0.875813	0.956893	0.644863	-2.07377	8.6091e-15	4.16e-14	down
Gallus_gallus_newGene_29086		269	363	147	6179	2026	5363	0.852569	0.796191	0.961688	1.82423	1.38357	1.36931	-2.10863	8.0315e-15	4.16e-14	down
Gallus_gallus_newGene_30978		49	18	76	256	250	346	0.647192	0.228357	0.94022	3.94982	1.78952	2.32133	-1.2467	4.965e-06	0.000192577	down
Gallus_gallus_newGene_33765		282	699	627	1810	1104	3536	0.284761	0.710103	0.63577	1.85866	1.16689	3.6212	-1.04782	8.15052e-05	0.00454083	down
Gallus_gallus_newGene_38615		287	309	314	1109	2603	2499	0.160825	0.174544	0.285669	0.950926	1.60156	1.43893	-1.94099	4.31238e-16	3.76e-14	down
Gallus_gallus_newGene_39465		96	74	78	405	205	306	0.394959	0.200572	0.190486	1.31922	0.612513	1.0052	-1.25367	3.84026e-07	4.23e-05	down
Gallus_gallus_newGene_53771		1	1	0	300	179	188	0.001136	0.000466	0	0.635092	0.374768	0.400388	-2.761	4.85511e-22	9.29e-25	down
Gallus_gallus_newGene_63216		134	132	51	1443	1349	1000	0.326868	0.56698	0.103174	7.5764	6.36086	4.70552	-2.23037	5.47373e-18	5e-17	down
Gallus_gallus_newGene_68483		423	464	302	1139	1467	850	1.0399	1.12686	0.621796	1.49538	2.22889	0.979229	-1.1812	6.6374e-08	1.17e-05	down
Gallus_gallus_newGene_80083		2131	3498	2425	8563	7800	4429	0.985396	1.62868	1.1175	4.02072	3.61682	2.08942	-1.0089	7.77105e-06	0.00115919	down
Gallus_gallus_newGene_80673		43	32	45	184	199	114	0.262671	0.19973	0.275444	1.16087	1.2436	0.719667	-1.2956	2.11569e-07	2.97e-05	down
